# 1 Discriminating Mild from Critical COVID-19 by Innate and 2 Adaptive Immune Single-cell Profiling of Bronchoalveolar 3 Lavages

4 Running title: Immune Atlas of COVID-19 Bronchoalveolar Lavages

5  
6  
7 Els Wauters<sup>1,2,14</sup>, Pierre Van Mol<sup>2,3,4,14</sup>, Abhishek D. Garg<sup>5,14</sup>, Sander Jansen<sup>6,14</sup>, Yannick  
8 Van Herck<sup>7</sup>, Lore Vanderbeke<sup>8</sup>, Ayse Bassez<sup>3,4</sup>, Bram Boeckx<sup>3,4</sup>, Bert Malengier-  
9 Devlies<sup>9</sup>, Anna Timmerman<sup>3,4</sup>, Thomas Van Brussel<sup>3,4</sup>, Tina Van Buyten<sup>6</sup>, Rogier  
10 Schepers<sup>3,4</sup>, Elisabeth Heylen<sup>6</sup>, Dieter Dauwe<sup>10</sup>, Christophe Doods<sup>1,2</sup>, Jan Gunst<sup>10</sup>,  
11 Greet Hermans<sup>10</sup>, Philippe Meersseman<sup>11</sup>, Dries Testelmans<sup>1,2</sup>, Jonas Yserbyt<sup>1,2</sup>,  
12 Patrick Matthys<sup>9</sup>, Sabine Tejpar<sup>12</sup>, CONTAGIOUS collaborators, Johan Neyts<sup>6,14</sup>,  
13 Joost Wauters<sup>11,14</sup>, Junbin Qian<sup>3,4,13,14</sup>, Diether Lambrechts<sup>3,4,14</sup>

14  
15  
16  
17 I Laboratory of Respiratory Diseases and Thoracic Surgery (BREATHE), Department of Chronic Diseases and  
18 Metabolism, KU Leuven, Belgium; 2 Department of Pneumology, University Hospitals Leuven, Belgium; 3  
19 Laboratory of Translational Genetics, Department of Human Genetics, KU Leuven, Belgium; 4 VIB Center for  
20 Cancer Biology, VIB, Leuven, Belgium; 5 Laboratory for Cell Stress & Immunity (CSI), Department of Cellular  
21 and Molecular Medicine (CMM), KU Leuven, Belgium; 6 Laboratory of Virology and Chemotherapy,  
22 Department of Microbiology, Immunology and Transplantation, Rega Institute, KU Leuven, Belgium; 7  
23 Laboratory of Experimental Oncology, Department of Oncology, KU Leuven, Belgium; 8 Laboratory of Clinical  
24 Bacteriology and Mycology, Department of Microbiology, Immunology and Transplantation, KU Leuven,  
25 Belgium; 9 Laboratory of Immunobiology, Department of Microbiology, Immunology and Transplantation, Rega  
26 Institute, KU Leuven, Belgium; 10 Laboratory of Intensive Care Medicine, Department of Cellular and  
27 Molecular Medicine, KU Leuven, Belgium; 11 Laboratory for Clinical Infectious and Inflammatory Disorders,  
28 Department of Microbiology, Immunology and Transplantation, KU Leuven, Belgium; 12 Molecular Digestive  
29 Oncology, Department of Oncology, KU Leuven, Belgium; 13 Women's Hospital, School of Medicine, Zhejiang  
30 University, Hangzhou 31006, Zhejiang, China; 14 These authors contributed equally;

31  
32  
33  
34 Correspondence: Junbin Qian ([Junbin.Qian@kuleuven.vib.be](mailto:Junbin.Qian@kuleuven.vib.be)) and Diether Lambrechts  
35 ([Diether.Lambrechts@kuleuven.vib.be](mailto:Diether.Lambrechts@kuleuven.vib.be))

36  
37  
38  
39  
40 **Keywords:** COVID-19, single-cell RNA-sequencing, single-cell TCR and BCR-sequencing,  
41 bronchoalveolar lavage, T-cell phenotyping, monocyte-to-macrophage differentiation, neutrophil,  
42 viral clearance

43 **ABSTRACT**

44 How innate and adaptive lung immune responses to SARS-CoV-2 synchronize during COVID-19  
45 pneumonitis and regulate disease severity is poorly established. To address this, we applied single-  
46 cell profiling to bronchoalveolar lavages from 44 patients with mild or critical COVID-19 *versus*  
47 non-COVID-19 pneumonia as control. Viral RNA-tracking delineated the infection phenotype to  
48 epithelial cells, but positioned mainly neutrophils at the forefront of viral clearance activity during  
49 COVID-19. In mild disease, neutrophils could execute their antiviral function in an immunologically  
50 ‘controlled’ fashion, regulated by fully-differentiated T-helper-17 (T<sub>H17</sub>)-cells, as well as T-helper-1  
51 (T<sub>H1</sub>)-cells, CD8<sup>+</sup> resident-memory (T<sub>RM</sub>) and partially-exhausted (T<sub>EX</sub>) T-cells with good effector  
52 functions. This was paralleled by ‘orderly’ phagocytic disposal of dead/stressed cells by fully-  
53 differentiated macrophages, otherwise characterized by anti-inflammatory and antigen-presenting  
54 characteristics, hence facilitating lung tissue repair. In critical disease, CD4<sup>+</sup> T<sub>H1</sub>- and CD8<sup>+</sup> T<sub>EX</sub>-  
55 cells were characterized by inflammation-associated stress and metabolic exhaustion, while CD4<sup>+</sup>  
56 T<sub>H17</sub>- and CD8<sup>+</sup> T<sub>RM</sub>-cells failed to differentiate. Consequently, T-cell effector function was largely  
57 impaired thereby possibly facilitating excessive neutrophil-based inflammation. This was  
58 accompanied by impaired monocyte-to-macrophage differentiation, with monocytes exhibiting an  
59 ATP-purinergic signalling-inflammasome footprint, thereby enabling COVID-19 associated fibrosis  
60 and worsening disease severity. Our work represents a major resource for understanding the lung-  
61 localised immunity and inflammation landscape during COVID-19.

62  
63  
64  
65  
66  
67  
68

## 69 INTRODUCTION

70 SARS-CoV-2 has rapidly swept across the globe affecting >7 million people, with >400,000 fatal  
71 cases<sup>1</sup>. It is now well appreciated that while most COVID-19 patients (80%) remain asymptomatic  
72 or experience only mild symptoms, 20% present with overt pneumonia; about a quarter of these  
73 progress to a life-threatening state of Acute Respiratory Distress Syndrome (ARDS) and severe  
74 or atypical systemic inflammation<sup>2</sup>. Fever, increased acute phase reactants and coagulopathy with  
75 decreased lymphocyte counts, pronounced myeloid inflammation and increased neutrophil-to-  
76 lymphocyte ratio are predominant immunological hallmarks of severe COVID-19<sup>3,4</sup>.

77 Wen *et al.* were the first to provide an immune atlas of circulating mononuclear cells from 10  
78 COVID-19 patients based on single-cell RNA-sequencing (scRNA-seq). Lymphocyte counts were  
79 globally decreased, while inflammatory myeloid cells, predominantly IL1 $\beta$ -secreting classical  
80 monocytes, were more abundant, suggesting COVID-19 immunopathology to be a myeloid-driven  
81 process<sup>5</sup>. Conversely, the contribution of circulating classical monocytes to systemic inflammation  
82 was put into question by Wilk *et al.* Based on scRNA-seq, they observed sparse expression of  
83 inflammatory cytokines by peripheral monocytes in 7 COVID-19 patients versus 6 six healthy  
84 controls. On the other hand, antigen presentation and the number of cytotoxic NK- and T-cells  
85 were reduced, while plasmablasts and neutrophils were increased, especially in in COVID-19  
86 patients experiencing ARDS<sup>6</sup>.

87 However, profiling the peripheral immune landscape in COVID-19 may not be as comprehensive  
88 since immune characteristics in the periphery are different from those within the lungs, both in  
89 terms of amplitude and qualitative characteristics, as well as duration of the immune response.  
90 Thus, a better understanding of the immune interactions in COVID-19 lungs is needed. In their  
91 seminal paper, Liao *et al.* applied single-cell T-cell receptor-sequencing (scTCR-seq) and scRNA-  
92 seq on bronchoalveolar lavage (BAL) fluid from 3 mild and 6 critical COVID-19 patients, as well as  
93 3 healthy controls. They observed an abundance of highly inflammatory monocytes and neutrophils  
94 and T-cell depletion in critical versus mild COVID-19. The latter showed a more potent adaptive  
95 immune response to SARS-CoV-2, evidenced by presence of CD8<sup>+</sup> T-cells with tissue-resident  
96 features displaying clonal expansion and increased effector function<sup>7</sup>. Subsequently, Bost *et al.* were  
97 able to sort infected cells from bystander cells and investigate virus-induced transcriptional changes.  
98 This Viral-Track pipeline showed ciliated and progenitor epithelial cells to be the main targets of  
99 SARS-CoV-2, yet a strong enrichment of viral RNA was observed in SPPI<sup>+</sup> macrophages<sup>8</sup>. It is  
100 unclear however whether this represents direct viral infection of myeloid cells, or phagocytosis of

101 viral particles (or virus-infected cells). Moreover, due to the small sample size, in-depth  
102 characterization of all the cellular phenotypes detected by scRNA-seq in mild *versus* critical  
103 COVID-19 remained largely unexplored.

104 Here, we provide a comprehensive deep-immune atlas of COVID-19 pneumonitis, analyzing BAL  
105 from 31 COVID-19 patients with mild or critical disease, while inclusion of 13 patients with non-  
106 COVID-19 pneumonitis allowed us to reliably distinguish non-specific lung-localised inflammatory  
107 signaling from COVID-19 specific lung-associated immune changes.

## 108 109 **RESULTS**

### 110 **scRNA-seq and cell typing of BAL samples**

111 We performed scRNA-seq on BAL from 22 hospitalized patients with a positive qRT-PCR for  
112 SARS-CoV-2 on a nasopharyngeal swab or a lower respiratory tract sample. We also collected  
113 BAL from 13 patients with clinical suspicion of COVID-19 pneumonia, yet negative PCR on lower  
114 respiratory tract sampling for SARS-CoV-2. These samples are referred to as non-COVID-19. We  
115 further stratified COVID-19 patients by disease severity at the time of sampling, by discerning two  
116 groups; a 'mild' (n=2) and a 'critical' (n=20) disease group, the latter requiring mechanical  
117 ventilation or extracorporeal membrane oxygenation. Demographic and clinical data of the  
118 prospectively recruited patient cohort are summarised in Supplementary information, **Table S1**.

119 BAL samples were immediately processed for scRNA-seq. After quality filtering (Methods), we  
120 obtained ~186 millions of unique transcripts from 65,166 cells with >150 genes detected. Of these,  
121 ~51% of cells were from COVID-19. Subsequent analysis involving dimensionality reduction and  
122 clustering identified several clusters (**Fig. 1a**), which through marker genes (Supplementary  
123 information, **Fig. S1a, b**) could be assigned to lung epithelial cells (including ciliated, inflammatory,  
124 hillock, secretory and AT2 lung epithelial cells), myeloid cells (monocytes/macrophages,  
125 neutrophils, mast cells, plasmacytoid dendritic cells/pDCs and conventional dendritic cells/cDCs),  
126 lymphoid cells (CD4<sup>+</sup> and CD8<sup>+</sup> T-cells, natural killer cells (NK), B-cells and plasma cells). We  
127 describe each cell type in more detail, highlighting the number of cells, read counts and transcripts  
128 detected in Supplementary information, **Table S2**. There was no cluster bias between disease  
129 status (COVID-19 *versus* non-COVID-19), disease severity (mild *versus* critical) or individual  
130 patients (**Fig. 1b**).

131 To increase our resolution, we processed scRNA-seq data on COVID-19 BAL by Liao et al.,  
132 consisting of 3 patients with 'mild' and 6 patients with 'critical' COVID-19 (n=51,631 cells)

133 (Supplementary information, **Fig. S1c**)<sup>7</sup>. We also retrieved 7 normal lung samples (n=64,876 cells)  
134 profiled by Lambrechts et al. and 8 normal lung samples (n= 27,266 cells) by Reyfman et al. to  
135 further enhance our resolution, specifically for T-cells and DCs<sup>9,10</sup>. Datasets were integrated by  
136 clustering cells from each dataset separately and assigning cell type identities to each cell. We then  
137 pooled cells from each dataset based on cell type identities and performed canonical correlation  
138 analysis (CCA), as described previously<sup>11</sup>, followed by graph-based clustering to generate a UMAP  
139 per cell type, displaying its phenotypic heterogeneity. Per cell type, we ruled out batch effects due  
140 to different datasets.

141 After integration, COVID-19 BAL scRNA-seq data were derived from 5 mild and 26 critical  
142 COVID-19 patients. Quantitatively, monocyte/macrophages and neutrophils were the most  
143 abundant cell types, amounting up to 65.7% (n=55,825) of COVID-19 cells (**Fig. 1c**). When  
144 evaluating the relative enrichment or depletion of these cell types, we found that monocytes and  
145 neutrophils were indeed more frequent, while macrophages and epithelial cells were less abundant  
146 in COVID-19 versus non-COVID-19. B-cells and NK-cells were slightly enriched in COVID-19.  
147 Comparing mild versus critical COVID-19 revealed an increase in CD8<sup>+</sup> T-cells, macrophages and  
148 cDCs in the former (**Fig. 1d**).

149 Below, we describe the heterogeneity underlying each cell type in more detail.

### 150 **Phenotypic heterogeneity of CD8<sup>+</sup> T-cells in COVID-19 BAL**

151 Altogether, we retrieved 23,468 T- and NK-cells, which were subclustered into 14 phenotypes  
152 (**Fig. 2a, b**; Supplementary information, **Fig. S2**). Briefly, we identified 7 CD8<sup>+</sup> T-cell clusters, 5  
153 CD4<sup>+</sup> T-cell clusters and 2 NK-cell clusters. While naïve CD8<sup>+</sup> T-cells (T<sub>N</sub>) expressed naïve T-cell  
154 markers (*CCR7*, *LEF1* and *TCF7*), effector-memory (T<sub>EM</sub>) and partially-exhausted (T<sub>EX</sub>) T-cells were  
155 characterized by increased expression of effector markers (*IFNG*, *PRFI*, *NKG7* and *GZMB*). Herein,  
156 expression of (inflammation-driven) exhaustion-defining immune-checkpoints (*LAG3*, *HAVCR2* and  
157 *PDCDI*) distinguished T<sub>EX</sub>-cells. Additionally, we identified CD8<sup>+</sup> resident-memory T-cells (T<sub>RM</sub>)  
158 based on *ZNF683* and *ITGAE*, as well as CD8<sup>+</sup> recently-activated effector-memory T-cells (T<sub>EMRA</sub>).  
159 Finally, we also identified mucosal-associated invariant T-cells (T<sub>MAIT</sub>) and gamma-delta (T<sub>Vδ</sub>) T-cells.

160 Next, we assessed prevalence of each T-cell phenotype in COVID-19 versus non-COVID-19  
161 disease, but failed to observe differences in the CD8<sup>+</sup> phenotypes (**Fig. 2c**). When comparing mild  
162 to critical COVID-19 (**Fig. 2d**), we found T<sub>MAIT</sub>-cells to be increased in the former. Interestingly,  
163 T<sub>MAIT</sub>-cells can actively co-opt for specific innate immune characteristics (e.g. proficient pattern-  
164 recognition receptor-based signalling, and/or broad non-MHC antigenic surveillance), thereby

165 allowing them to rapidly respond to pathogenic agents possessing pathogen-associated molecular  
166 patterns (PAMPs)<sup>12</sup>.

167 The largest increase in mild *versus* critical COVID-19, however, was seen for CD8<sup>+</sup> T<sub>RM</sub>-cells. To  
168 understand this difference, we used Slingshot to infer pseudotime trajectories (excluding CD8<sup>+</sup>  
169 T<sub>MAIT</sub><sup>-</sup> and T<sub>γδ</sub>-cells). We observed 3 distinct CD8<sup>+</sup> T-cell trajectories (**Fig. 3a**): CD8<sup>+</sup> T<sub>N</sub>-cells  
170 connected with T<sub>EM</sub>-cells, which subsequently branched into 3 different (well-connected) lineages  
171 i.e., T<sub>RM</sub>-cells, T<sub>EX</sub>-cells and T<sub>EMRA</sub>-cells. Profiling of marker genes along these trajectories confirmed  
172 their functional annotations (**Fig. 3b**). Notably, effector function peaked halfway in each lineage  
173 and then stabilized or decreased, depending on the lineage (**Fig. 3c**). Next, density plots reflecting  
174 the relative number of T-cells in each phenotypic state were created along these trajectories (**Fig.**  
175 **3d**), and stratified for normal tissue, non-COVID-19, and mild or critical COVID-19. Non-COVID-  
176 19 T-cells were enriched towards the end of the T<sub>RM</sub>-lineage, while in COVID-19 they were more  
177 frequent in the T<sub>EX</sub>-lineage (**Fig. 3e**). In contrast, T<sub>EMRA</sub>-cells were more differentiated in normal  
178 lung. When comparing mild to critical disease, the T<sub>RM</sub>-lineage was more differentiated in mild  
179 COVID-19, while along the T<sub>EX</sub>-lineage differentiation was most prominent in critical COVID-19  
180 (**Fig. 3f**). There were no differences in the T<sub>EMRA</sub>-lineage.

181 We also processed T-cells by scTCR-seq, obtaining 3,966 T-cells with a TCR sequence that were  
182 also annotated by scRNA-seq (excluding NK-, T<sub>MAIT</sub><sup>-</sup> and T<sub>γδ</sub>-cells). Based on TCR sharing, we  
183 could reinforce the 3 trajectories identified by Slingshot (**Fig. 3g**). Overall, CD8<sup>+</sup> T<sub>RM</sub>-cells  
184 contained the highest number of T-cell clonotypes. Plotting TCR richness and evenness along the  
185 trajectories, revealed that both parameters were reduced along the T<sub>RM</sub>-lineage, specifically in  
186 COVID-19 (**Fig. 3h**), likely indicating antigen-driven clonal expansion. Notably, this expansion was  
187 more prominent in mild COVID-19 (**Fig. 3i**). In contrast, T<sub>EX</sub>-cells were characterized by only a  
188 modest decrease in TCR richness/evenness along their lineage. In the T<sub>EMRA</sub> lineage, richness did  
189 not decrease along the pseudotime.

190 Overall, this suggests that mild COVID-19 is characterized by fully-differentiated T<sub>RM</sub>-cells  
191 undergoing active (presumably antigen-driven) TCR expansion and selection, while T<sub>EX</sub>-cells are  
192 entangled halfway their trajectory. In critical COVID-19, T<sub>RM</sub>-cells fail to differentiate or expand,  
193 while T<sub>EX</sub>-cells become more exhausted albeit without undergoing clonal expansion.

#### 194 **Gene expression modelling along the CD8<sup>+</sup> T<sub>RM</sub><sup>-</sup> and T<sub>EX</sub>-lineage**

195 We then modelled gene expression along the T<sub>RM</sub><sup>-</sup> and T<sub>EX</sub>-lineage, and identified 5 gene sets with  
196 a specific expression pattern in each trajectory. In the T<sub>RM</sub>-lineage, set 1 and 2 consisted of naive

197 T-cell markers (set 1: *CCR7*, *LEF1*, *TCF7*; set 2: *SELL*), whose expression decreased along the  
198 trajectory (**Fig. 3j**; Supplementary information, **Table S3**). A third set was enriched for interferon  
199 (IFN)-induced (anti-viral) genes (*IFI6*, *IFI44L*, *ISG15*, *ISG20*, *MX2*), activation-associated genes (*CD38*)  
200 and genes mediating effector-memory functions (*GZMK*, *CD44*, *KLRG1*). Set 3 exhibited high  
201 expression halfway of the trajectory. Genes from the last 2 sets were expressed at the end of the  
202 trajectory and were mostly related to cytotoxicity and increased effector function (set 4: *GZMA*,  
203 *GZMB*, *FASLG*, *CXCR3*, *CCL5*), a balance of pro-inflammatory and auto-regulatory genes (set 5:  
204 *ITGAI*, *TNF*, *XCL2*, *CD7* versus *LGALS3*, *SLAMF1*, *S100A4*) and genes marking resident memory  
205 formation (*ZNF683*, *ITGAE*)<sup>13,14</sup>. In mild COVID-19, T<sub>RM</sub>-cells mainly expressed set 3-5 genes,  
206 indicating increased (but balanced) effector function.

207 In the T<sub>EX</sub>-lineage, the first set contained naïve markers (*LEF1*, *CCR7*, *TCF7*), a second set IFN-  
208 induced (anti-viral) genes (*MX1*, *MX2*, *ISG15*, *IFI44*, *IFIT5*, *IFI6*), while a third set besides *IFNG* and  
209 IFN-induced genes (*IFI27*, *IFI27L2*) was also comprised of T-cell activation-related genes (*CD38*,  
210 *GZMH*, *GZMA*), chemokines (*CCL3*, *CCL4* and *CCL5*), cytotoxicity- (*NKG7*, *GNLY*, *GZMB*) and  
211 (inflammatory) exhaustion-related genes (*HAVCR2*) (**Fig. 3k**; Supplementary information, **Table**  
212 **S4**). Set 4 was characterized by expression of pro-inflammatory (*CD70*, *COTL*, *HMGB1*) and anti-  
213 inflammatory genes (*ENTPD1*, *ANXA5*, *SERPINB1*), suggesting these cells exhibit a chronic  
214 dysregulated hyperinflammatory phenotype. We also noticed expression of the TIM auto-  
215 regulatory protein family (*TIMD4*) and viral infection-induced auto-regulatory genes (*LGALS1*,  
216 *LGALS3*)<sup>15,16</sup>. In set 5, cell-cycle genes (*CDK1*, *KIFs*, *PCNA*, *CCNA/B2*), stress-associated genes (*HSPD1*,  
217 *HSP90AA1*, *BIRC5*) and chromatin re-modelling related genes (e.g., *HMGB2*, *HMGB3*, *EZH2*) were  
218 increased, suggesting that T-cells were largely adjusting to inflammation-driven stress (rather than  
219 mounting any discernible effector or auto-regulatory responses). Notably, mild COVID-19 showed  
220 a very prominent enrichment in cells characterized by set 3-associated genes, whereas critical  
221 COVID-19 was enriched for set 4-5 T<sub>EX</sub>-cells.

222 Overall, gene expression profiling along the trajectories confirmed that mild COVID-19 exhibits  
223 CD8<sup>+</sup> T<sub>RM</sub><sup>-</sup> and T<sub>EX</sub>-cells with good effector function, while in critical COVID-19 this effector  
224 function is drastically reduced possibly due to (persistent) inflammation-associated stress.

### 225 **Phenotypic heterogeneity of CD4<sup>+</sup> T-cells in COVID-19 BAL**

226 Amongst the 5 CD4<sup>+</sup> T-cell clusters, we identified naïve CD4<sup>+</sup> T-cells (T<sub>N</sub>), effector-memory T-  
227 cells (T<sub>EM</sub>), CD4<sup>+</sup> T-helper-1 (T<sub>HI</sub>) cells, expressing high levels of immune-checkpoints (*HAVCR2*,  
228 *LAG3*, *PDCD1* and *CTLA4*), as well as CD4<sup>+</sup> T-helper-17 (T<sub>HI17</sub>) and CD4<sup>+</sup> regulatory T-cells (T<sub>REG</sub>)

229 (**Fig. 2b** for marker gene sets). Compared to non-COVID-19, we observed slightly less CD4<sup>+</sup>  
230 T<sub>H17</sub>-cells, but more T<sub>H1</sub>-cells in COVID-19. Comparing mild *versus* critical COVID-19, we found  
231 T<sub>H1</sub>-cells to be significantly increased in the latter.

232 Slingshot revealed additional phenotypic heterogeneity, identifying central-memory CD4<sup>+</sup> T<sub>CM</sub>-cells  
233 and stem cell-like memory CD4<sup>+</sup> T<sub>SCM</sub>-cells (**Fig. 4a, b**), and constructed 3 trajectories, which  
234 were independently confirmed based on shared TCR clonotypes (**Fig. 4c**). Briefly, T<sub>N</sub>-cells  
235 connected closely with T<sub>CM</sub>-cells followed by T<sub>EM</sub>-cells, which branched-off into 3 different lineages  
236 to form T<sub>H1</sub>-cells, T<sub>H17</sub>-cells and T<sub>SCM</sub>-cells. Profiling of marker genes along these trajectories  
237 confirmed their functional annotation (**Fig. 4d**). Density plots stratified for T-cells from each  
238 subgroup revealed that COVID-19 was enriched for T-cells early and late in the T<sub>H1</sub>- and T<sub>SCM</sub>-  
239 trajectory, while *vice versa* T-cells from non-COVID-19 and normal lung were enriched halfway  
240 these trajectories (**Fig. 4e, f**). In the T<sub>H17</sub>-trajectory, COVID-19 BAL was strongly enriched for T-  
241 cells in the first half of the trajectory. Overall, CD4<sup>+</sup> T-cells from mild COVID-19 behaved similarly  
242 as normal lung or non-COVID-19. Both TCR richness and evenness were reduced along the T<sub>H1</sub>-  
243 lineage from COVID-19, but not from non-COVID-19 (**Fig. 4g**). Notably, this reduction was most  
244 prominent in mild, but not in critical COVID-19 (**Fig. 4h**). In contrast, T<sub>H17</sub>-cells and T<sub>SCM</sub>-cells  
245 were characterized by a modest decrease in TCR richness only at the very end of their lineage,  
246 suggesting that mainly T<sub>H1</sub>-cells are selected for specific SARS-CoV-2 PAMPs/antigens.

247 Overall, this suggests that mild COVID-19 is characterized by more stable or differentiated T<sub>H17</sub>-  
248 cells' activity, which is crucial for productive immunity against pathogens at mucosal surfaces<sup>17</sup>,  
249 whereas T<sub>H1</sub>-cells become entangled halfway in their trajectory. In critical COVID-19, T<sub>H17</sub> cells  
250 completely fail to differentiate, while T<sub>H1</sub>-cells behave the opposite.

### 251 **Gene expression modelling along the CD4<sup>+</sup> T<sub>H1</sub>- and T<sub>H17</sub>-lineage**

252 Differential gene expression analysis along both lineages identified gene sets with specific  
253 expression profiles. In the T<sub>H1</sub>-lineage, the first gene set consisted of naïve (*LEF1*, *TCF7*) and  
254 undifferentiated (*CCR7*, *SIPRI*) T-cell markers (**Fig. 4i**; Supplementary information, **Table S5**). A  
255 second set was enriched for both pro- and anti-inflammatory markers (*CXCR4*, *CXCL2*, *ANXA1*,  
256 *SOCS2*, *LTB*), while a third set was characterized (halfway the trajectory) by an effector-like T<sub>H1</sub>-  
257 program based on expression of *IFNG*, granzymes (*GZMA*, *GZMK*, *GZMB*), *CXCR3*, *PRFI*, *NGK7*,  
258 *CCL5*, as well as *CTLA4* and *HAVCR2*. Finally, a fourth gene set was characterized by high HLA  
259 expression, auto-regulatory markers (*LGALS1*, *CCL3*), partial activation markers (*CXCL13*) and  
260 stress-response markers (*PDIA6*, *HSBP1*, *VDAC3*, *PARP1*) at the end of the trajectory, suggesting a



261 complex mixture of a pro- and anti-inflammatory phenotype coupled with early-stress modulation.  
262 In a final fifth set, we noticed mitochondrial stress (*LDHA*, *PKM*, *COX17*, *VDAC1*, *COX8A*), an IL2  
263 withdrawal-associated stressed phenotype (*MTIE*, *MTIX*), proteotoxic stress  
264 (*PSMB3/B6/D4/A7/C3*, *HSPB11*, *PARK7*, *EIF4EBP1*) and glycolysis (*PGAM1*) suggesting ‘terminal  
265 exhaustion’ at the end of the T<sub>HI</sub>-trajectory<sup>18,19</sup>. Overall, in mild COVID-19, the T<sub>HI</sub>-lineage was  
266 enriched for cells halfway the trajectory where expression of set 2-3 genes was most dominant,  
267 indicating increased T<sub>HI</sub>-effector function. In critical COVID-19, expression of sets 4-5 pre-  
268 dominated, suggesting inflammation-driven terminal exhaustion and severe dysregulation.

269 In the T<sub>HI7</sub>-lineage, we also identified 5 gene sets (**Fig. 4j**; Supplementary information, **Table S6**):  
270 the first 2 sets with high expression early in the trajectory did not express markers indicative of  
271 T<sub>HI7</sub> function. Three other gene sets with high expression at the end of the trajectory were  
272 characterized by T-cell effector function (set 3: *PDCD1*, *CCL5*, *CXCR2*, *CCR2* and *GZMA/B*),  
273 expression of cytotoxic-activity genes (set 4: *NKG7* and *PRF1*) and T<sub>HI7</sub>-cell associated interleukins  
274 (set 5: *IL17A*, *IL17F*, *IL23R*, as well as *IFNG* and *CCL4*). Notably, in mild COVID-19, cells were  
275 characterized by expression of genes belonging to set 3-5, while critical patients only expressed  
276 set 1-2 genes, completely failing to differentiate along the T<sub>HI7</sub> lineage.

277 Overall, this clearly indicates that mild COVID-19 is characterized by improved T<sub>HI</sub>- and T<sub>HI7</sub>-  
278 effector functions that together mediate a highly controlled antiviral immune response, whose  
279 absence underlies critical COVID-19.

### 280 **Trajectory of monocyte-to-macrophage differentiation in COVID-19 BAL**

281 In the 63,114 myeloid cells derived from BAL, we identified 9 phenotypes (**Fig. 5a**). Monocytes  
282 clustered separately from macrophages based on the absence of macrophage markers (*CD68*,  
283 *MSR1*, *MRC1*) and presence of monocyte markers (*IL1RN*, *FCN1*, *LILRA5*). Monocytes could be  
284 further divided into *FCN1*<sup>high</sup>, *IL1B*<sup>high</sup> and *HSPA6*<sup>high</sup> monocytes (**Fig. 5b**; Supplementary  
285 information, **Fig. S3a**), respectively, characterized by expression of classical monocyte markers  
286 (*IL1RN*, *S100A8/9*), pro-inflammatory cytokines (*IL1B*, *IL6*, *CCL3*, *CCL4*) and heat-shock proteins  
287 (*HSPA6*, *HSPA1A/B*). Based on *CSF1R*, *CSF3R* and *SPPI*, 3 monocyte-derived macrophage  
288 phenotypes could further be delineated, including *CCL2*<sup>high</sup>, *CCL18*<sup>high</sup> and *RGS1*<sup>high</sup> (Supplementary  
289 information, **Fig. S3b**). *CCL2*<sup>high</sup> clusters were characterized by the pro-migratory cytokine *CCL2*,  
290 but also by several pro- (*CCL7*, *CXCL10*) and anti-inflammatory (*CCL13*, *CCL22*) genes, suggesting  
291 existence of an intermediate population of cells. In contrast, *CCL18*<sup>high</sup> and *RGS1*<sup>high</sup> cells expressed  
292 mainly anti-inflammatory genes (*CCL13*, *CCL18*, *PLD4*, *FOLR2*), as well as genes involved in receptor-

293 mediated phagocytosis (*MERTK*, *AXL*). Finally, we identified *MTIG*<sup>high</sup> macrophages (expressing  
294 numerous metallothioneins suggestive of oxidative stress or immune cell's growth factor-  
295 withdrawal), a monocyte-derived (*FABP4*<sup>medium</sup>) and tissue-resident (*FABP4*<sup>high</sup>) alveolar macrophage  
296 cluster. The latter two populations were characterized by high expression of resident markers  
297 (*FABP4*, *PPARG*), anti-inflammatory (*CCL18*, *CCL22*) and antigen-presentation relevant MHC-I/II  
298 genes.

299 We observed a significant increase in *FCNI*<sup>high</sup> and *IL1B*<sup>high</sup> monocytes in COVID-19 versus non-  
300 COVID-19, while *FABP4*<sup>medium</sup> and *FABP4*<sup>high</sup> alveolar macrophages were reduced (**Fig. 5c**). *FCNI*<sup>high</sup>  
301 monocytes were significantly reduced in mild COVID-19, while alveolar macrophages were  
302 increased (**Fig. 5d**). Using Slingshot, we reconstructed two monocyte-to-macrophage lineages,  
303 consisting of a common branch of *FCNI*<sup>high</sup> monocytes differentiating into *IL1B*<sup>high</sup> monocytes,  
304 followed by *CCL2*<sup>high</sup> and *CCL18*<sup>high</sup> monocyte-derived macrophages. These subsequently branched  
305 into *RGS1*<sup>high</sup> monocyte-derived macrophages (*RGS1*-lineage), or via *FABP4*<sup>medium</sup> into *FABP4*<sup>high</sup>  
306 tissue-resident macrophages (alveolar lineage; **Fig. 5e**). Monocyte marker expression decreased  
307 along both lineages, while macrophage marker expression increased (**Fig. 5f**). Density plots  
308 revealed that in COVID-19 cells were enriched in the first half of both lineages (**Fig. 5g**),  
309 confirming our above observations of monocyte enrichment in COVID-19. Comparing mild to  
310 critical COVID-19, we noticed that the former differentiated along both lineages, whereas in the  
311 latter monocytes completely failed to differentiate (**Fig. 5h**).

312 Modelling gene expression along the alveolar lineage revealed 5 gene sets (**Fig. 5i**; Supplementary  
313 information, **Table S7**). Sets 1 and 2 were characterized by inflammatory markers (*CXCL1-3*,  
314 *CCL20*, *CXCL8*, *CXCL10*, *CCR1*, *IL1B*), survival factors (*RAC1*, *JAK1*, *ZEB2*, *CDKN1A*), IFN-induced  
315 (anti-viral) genes (*IFITM1-3*, *IFIT1-3*, *IRF1*, *MX1/2*), hypoxia (*HIF1A*) and NF-κB (*NFKB1/2*, *NFKBIZ*)  
316 signalling early in the lineage, suggesting these monocytes to be characterized by a  
317 hyperinflammatory state, in which they prioritized inflammation rather than committing toward  
318 differentiation into macrophages. The third gene set was characterized by a possible CD47-based  
319 macrophage-suppressive phenotype, potentially aimed at dysregulating macrophage-activation  
320 (since CD47 is a well-established 'don't eat me' signal striving to avoid auto-immunity)<sup>20,21</sup>.  
321 Moreover, based on expression of purinergic signalling (*P2RX7*), inflammasome or IL1-modulating  
322 factors (*NLRP3*, *IL1B*, *IL10RA*, *CTSL*, *CALM1*, *NFKB1*), endoplasmic reticulum (ER) stress capable of  
323 enabling ATP secretion (*UBC*, *PSMB9*, *SEC61G*, *ATF5*, *ATF3*), unconventional trafficking (*VAMP5*),  
324 fibrosis-related factors (*FGL2*, *TGFBI*, *COTLI*) and vascular inflammation (*TNF*, *AIFI*, *RNF213*, *CCL2*,  
325 *CCL8*) across sets 2 and 3 of these monocytes, we strongly suspect presence of extracellular ATP-

326 driven purinergic-inflammasome signalling; especially given the high likelihood of extracellular ATP  
327 release from damaged epithelium in the context of acute viral infection. Importantly, this ATP-  
328 driven purinergic-inflammasome signalling pathway is a danger signalling cascade, which has been  
329 shown to facilitate ARDS-associated lung fibrosis and thus acts disease-worsening in this context<sup>22-</sup>  
330 <sup>24</sup>. Finally, set 4 and 5 genes were expressed at the end of the trajectory. Set 4 was characterized  
331 by expression of chaperone-coding genes (*CALU*, *CALR*, *CANX*, *PDIA4*, *HSP90B1*), which are crucial  
332 for robust functioning of the antigen-loading machinery for MHC molecules, whereas in set 5 there  
333 were clear signs of antigen presentation (expression of numerous MHC class II genes).  
334 Furthermore, set 5 comprised genes involved in receptor-mediated phagocytosis and post-  
335 phagocytic lipid degradation/metabolism: *APOE* for lipid metabolism, scavenger receptors *MARCO*  
336 and *MSRI*, complement activation (*CIQA*, *CIQB*, *CIQC* and *CD46*; that can also facilitate  
337 phagocytosis), viral infection-relevant inflammatory orientation (*CD81*, *CD9*), as well as anti-  
338 inflammatory markers (*PPARG*, *FABP4*)<sup>25,26</sup>. Similar gene sets were observed for the RGS1-lineage  
339 (Supplementary information, **Fig. S3c**), except for gene set 5, which exhibited expression of genes  
340 involved in chemokine signalling desensitization (*RGS1*), phagocytosis (*AXL*) and ATP clearance  
341 (*ENTPDI*)<sup>27</sup>.

342 Overall, this indicates that mild COVID-19 is characterized by functional pro-phagocytic and  
343 antigen-presentation facilitating functions in myeloid cells, whereas critical COVID-19 is  
344 characterized by disease-worsening characteristics related to monocyte-based macrophage  
345 suppression and ATP-purinergic signalling-inflammasome that may enable COVID-19 associated  
346 fibrosis and can worsen patient prognosis.

### 347 **Qualitative assessment of T-cell and monocyte/macrophage function in COVID-19**

348 Next, although pseudotime inference usually allocates cells with a similar expression to the same  
349 pseudotime on the trajectory, we explored specific differences in gene expression along the  
350 pseudotime. We scored each cell using REACTOME pathway signatures and when comparing  
351 COVID-19 *versus* non-COVID-19 BAL, we observed consistently decreased IFN-signalling in non-  
352 COVID-19 T-cell and myeloid lineages (Supplementary information, **Fig. S4a**). In mild *versus*  
353 critical COVID-19, we observed that amongst several other pathways, IFN- (type I and II),  
354 interleukin (e.g., IL12 and IL6) and oligoadenylate synthetase (OAS) antiviral response signalling  
355 was increased in CD8<sup>+</sup> T<sub>RM</sub><sup>-</sup> and T<sub>EX</sub>-lineages (**Fig. 5j**; Supplementary information, **Fig. S4b-e**).  
356 The CD4<sup>+</sup> T<sub>HI</sub>-lineage was similarly characterized by increased IFN- (type I and II) and interleukin  
357 (IL6, IL12, IL21) signalling in mild COVID-19 (**Fig. 5k**; Supplementary information, **Fig. S4f, g**).

358 Additionally, TRAF6-induced NF- $\kappa$ B and IRF7 activation, as well as TGFBR complex activation were  
359 increased. Similar effects were observed in the T<sub>H17</sub>-lineage (Supplementary information, **Fig. S4h**,  
360 **i**). The alveolar macrophage lineage was characterized by increased phagocytosis-related pathways  
361 (scavenging receptors, synthesis of lipoxins or leukotrienes) and IFN-signalling in mild COVID-19  
362 (**Fig. 5l**; Supplementary information, **Fig. S4j-m**). *Vice versa*, IL10-signalling (which inhibits the IFN-  
363 response), chemokine receptor binding and ATF4-mediated ER stress response were increased in  
364 critical COVID-19.

365 Overall, while our trajectory and cell density analyses already indicated quantitative shifts in various  
366 cellular phenotypes comparing mild *versus* critical COVID-19, we noticed that also qualitatively  
367 immune cells from critical COVID-19 were severely dysfunctional.

### 368 **scRNA-seq of neutrophils, DCs and B-cells in COVID-19**

369 We retrieved 14,154 neutrophils, which were subclustered into 5 phenotypes (**Fig. 6a, b**;  
370 Supplementary information, **Fig. S5a**). A first cluster consisted of ‘progenitor’ neutrophils based  
371 on *CXCR4* and *CD63*, and was also characterized by expression of the angiogenic factor *VEGFA* and  
372 cathepsins (*CTSA*, *CTSD*) (**Fig. 6c**). A second cluster consisted of few ‘immature’ neutrophils  
373 expressing *LTF*, *LCN2*, *MMP8/9*, *PADI4* and *ARG1*. Cluster 3 and 4 consisted of ‘inflammatory mature’  
374 neutrophils, both expressing a signature footprint that highlights anti-pathogenic orientation of  
375 neutrophils<sup>28</sup>: cluster 3 expressed IFN-induced genes and calgranulins (*S100A8/9*, *S100A9* and  
376 *S100A12*), which can modulate inflammation, while cluster 4 expressed high levels of cytokines  
377 (*IL1B*) and chemokines (*CXCL8*, *CCL3*, *CCL4*). A final subset was characterized as ‘hybrid’  
378 neutrophils due to their macrophage-like characteristics, i.e., expression of MHC class II and  
379 complement activation genes (*CIQB*, *CIQC*, *CD74*), cathepsins (*CTSB*, *CTSL*) and *APOE*. All  
380 neutrophil subclusters were more frequent in COVID-19 than non-COVID-19, but most significant  
381 changes were noticed for the ‘progenitor’ and ‘inflammatory mature’ neutrophils (**Fig. 6d**). Similar  
382 trends were observed in mild *versus* critical COVID-19, albeit non-significantly (**Fig. 6e**).

383 We also identified 1,410 dendritic cells (DCs), which we could subcluster into 6 established  
384 populations (**Fig. 6f, g**; Supplementary information, **Fig. S5b, c**). None of these differed  
385 significantly between COVID-19 and non-COVID-19, while migratory DCs and Langerhans-cell-  
386 like DC were more frequent in mild *versus* critical COVID-19 (**Fig. 6h, i**).

387 Within the 1,397 B-cells, we obtained 4 separate clusters (**Fig. 6j**; Supplementary information, **Fig.**  
388 **S5d**). Follicular B-cells were composed of mature-naïve (CD27<sup>-</sup>) and memory (CD27<sup>+</sup>) B-cells.  
389 The former were characterized by a unique CD27<sup>-</sup>/IGHD<sup>+</sup>(IgD)/IGHM<sup>+</sup>(IgM) signature and give

390 rise to the latter by migrating through the germinal center to form CD27<sup>+</sup>/IGHD<sup>-</sup>(IgD)/IGHM<sup>-</sup>(IgM)  
391 memory B-cells (**Fig. 6k, l**). Memory B-cells then further differentiate into antibody-secreting  
392 plasma cells (*IGHA1*, *IGHG1*, *JCHAIN*). A first cluster of ‘active’ plasma cells expressed high levels  
393 of *PRDM1* (Blimp-1) and *XBPI*, indicating high antibody-secretion capacity, while the latter was  
394 enriched for *CLL2* and *CCL5*, but also characterized by a reduced G2M and S cell cycle score and  
395 increased expression of mitochondrial genes, indicating ongoing stress (**Fig. 6m**). Notably, this  
396 population of ‘terminal’ plasma cells was also characterized by increased BCR clonality and reduced  
397 BCR evenness (**Fig. 6n**). Compared to non-COVID-19, mature-naïve B-cells and active plasma  
398 cells were increased in COVID-19, while terminal B-cells were reduced in CoVID-19, albeit non-  
399 significantly (**Fig. 6o**). There were no significant differences between mild versus critical COVID-  
400 19 (**Fig. 6p**). Overall, this suggests terminal B-cells in COVID-19 to be characterized by sub-  
401 optimal differentiation or activation, which may cause defective or counter-productive (possibly  
402 low-quality) antibody responses in COVID-19.

#### 403 **SARS-CoV-2 viral particles in epithelial and immune cells**

404 Finally, we retrieved 22,215 epithelial cells, which we subclustered into 7 distinct clusters (**Fig. 7a**,  
405 **b**; Supplementary information, **Fig. S5e, f**), the largest 3 clusters consisting of secretory, ciliated  
406 and hillock lung epithelial cells. The basal population (*KRT5*, *AQP3* and *SPARCL1*), representing stem  
407 cell epithelial cells responsible for epithelial remodelling upon lung injury, was significantly enriched  
408 in COVID-19 versus non-COVID-19, as well as ionocytes, which is another rare epithelial cell type  
409 that regulates salt balance (**Fig. 7c**). There were no significant differences between mild versus  
410 critical COVID-19 (**Fig. 7d**). Interestingly, *ACE2* and *TMPRSS2* expression was increased in  
411 COVID-19 versus non-COVID-19, with 21% and 2.3% of epithelial cells being positive, respectively  
412 (**Fig. 7e, f**). We then assessed in which cells we retrieved sequencing reads mapping to the SARS-  
413 CoV-2 genome, identifying 3,773 positive cells from 17 out of 31 COVID-19 patients. Surprisingly,  
414 this revealed a higher overall number of reads mapping to lymphoid and myeloid than epithelial  
415 cells (**Fig. 7g**). Stratification for each of the 11 SARS-CoV-2 open-reading frames (ORF) using  
416 Viral-Track revealed that the RNA encoding for spike protein (*S*), which interacts with *ACE2*  
417 during viral entry of the cell, was almost exclusively detected in epithelial cells, which were also  
418 the only cells expressing *ACE2* and *TMPRSS2* (**Fig. 7g**). In contrast, the nucleocapsid protein (*N*),  
419 and to a lesser extent the ORF10 and ORF1a-encoding mRNAs were detected in myeloid and  
420 lymphoid cells at much higher levels than in epithelial cells (**Fig. 7h**). Further stratification into cell  
421 types revealed that neutrophils and to a limited extent also monocytes, contained most reads  
422 mapping to *N* (**Fig. 7i**). This might suggest that neutrophils are the main cell type interacting with

423 SARS-CoV-2 viral particles/infected cells and account for the highest procurement of viral material,  
424 in line with their role as first innate immune responders to infection<sup>29</sup>. Differential gene expression  
425 of *N*-positive versus *N*-negative neutrophils identified upregulation of transcription factor *BCL6*,  
426 which promotes neutrophils survival and inflammatory response following virus infection, and  
427 numerous IFN-induced genes (*IFITM3*, *IFIT1-3*, *MX1/2*, *ISG15*, *RSAD2*; **Fig. 7j**)<sup>30</sup>. No such  
428 enrichment was observed in monocytes nor macrophages (Supplementary information, **Fig. S5g-**  
429 **i**). Pathway analysis on differentially-expressed genes revealed IFN-signalling using REACTOME and  
430 Response\_to\_virus using GO for genes upregulated in *N*-containing neutrophils (**Fig. 7k, l**).  
431 Notably, amongst the different neutrophil phenotypes, *N* was most strongly enriched in  
432 ‘inflammatory mature’ neutrophils expressing calgranulins (**Fig. 7m**). As expected, significantly  
433 more *N* was present in critical versus mild COVID-19<sup>31</sup>.

#### 434 **Cell-to-cell communication to unravel the immune context of COVID-19 BAL**

435 Since, our data on the one hand reveal that neutrophils were involved in cleaning up viral  
436 particles/virus-infected cells, yet T-cell and monocyte-to-macrophage lineages were significantly  
437 disrupted in critical COVID-19, we explored the (predicted) interactome between these cell types  
438 to gain more refined insights. First, we calculated interactions between cell types ( $P \leq 0.05$ )  
439 separately for mild and critical COVID-19, then we assessed differences in the number of specific  
440 interactions. Neutrophils were characterized by a low number of specific interactions that were  
441 slightly more frequent in critical versus mild COVID-19. *Vice versa*, numerous specific interactions  
442 were predicted between all other immune and epithelial cells, especially in mild COVID-19 (**Fig.**  
443 **8a, b**; Supplementary information, **Fig. S6**).

444 In critical COVID-19, specific interactions between monocytes/macrophages and neutrophils  
445 almost always involved pro-migratory interactions (*FLT1*, *NRP1* or *NRP2/VEGFA*, *CXCL1* or *CXCL2*  
446 or *CXCL8/CXCR2*, *CCL3* or *CCL7/CCR1*), coupled with immune-inhibitory interactions, such as  
447 *LILRB1* or *LILRB2/HLA-F* and *RPS19/C5AR1*, which also induce neutrophil dysfunction (**Fig. 8c**)<sup>32</sup>. A  
448 few stimulatory T-cell to neutrophil interactions were observed, including *IFNG/type II IFNR*,  
449 *PDCD1/CD274*, *LTA/TNFRSF1A* or *TNFRSF1B* (**Fig. 8d**), while specific epithelial cell-to-neutrophil  
450 interactions were limited to a mixture of myeloid immunosuppression (*RPS19/C5AR1*) and viral  
451 infection-relevant pro-inflammatory signals (*TNFRSF14/TNFSF14*) (**Fig. 8e**). Amongst T-cell and  
452 monocytes/macrophages, some immune-stimulatory or auto-regulatory interactions were seen  
453 (*CTLA4* or *CD28/CD80* or *CD86*, *CCL5/CCR5*) (**Fig. 8f**), but specific epithelial to T-cell interactions  
454 in critical COVID-19 were limited to pro-inflammatory ICAM1-mediated interactions (**Fig. 8g**).

455 A very different scenario was observed in mild COVID-19 (**Fig. 8c-g**). Amongst the numerous  
456 interactions between monocytes/macrophages and neutrophils, we noticed interleukin signalling  
457 (bi-directional *IL1B*, *IL1A*, *IL1RN/A* signalling, *IL7/IL7R*, *CXCR2/CXCL1* or *CXCL8*), but also  
458 *MRC1/PTPR* (phagocytosis) and *LTBR/LTB* (pro-inflammation). Between T-cells and neutrophils  
459 specific interactions involved *CCR1/CCL3* or *CCL3L1* (pro-inflammation), *CD2/CD58* (co-  
460 stimulatory/immunogenic pathway) and *CD94:NKG2E/HLA-F* (anti-viral immune-surveillance),  
461 whereas between epithelial cells and neutrophils, *IL1R/IL1A* or *IL1B* or *IL1R* interactions were most  
462 pronounced (which can facilitate productive neutrophil immunity in an immune-  
463 controlled/immunogenic context)<sup>28,33,34</sup>. Numerous interactions were also observed between  
464 epithelial cells and monocyte/macrophages: *GAS6* or *PROS1/AXL* (receptor-mediated phagocytosis),  
465 *ADORA2B/ENTPD1* (extracellular ATP degradation/suppression), *CD83/PECAM1* (immune  
466 activation) and semaphorins interacting with their plexin and NRP receptors (tissue re-modelling  
467 and repair). Between epithelial cells and T-cells, we observed mainly co-stimulatory (*CD46/JAG1*,  
468 *CD40LG/CD40*, *IL7R/IL7*, *MICA* or *RAET1/IKG2D* receptor) and tissue repair interactions  
469 (*TGFB1/TGFR2* and *TGFB1/TGFR3*), while amongst T-cells and monocytes/macrophages, there  
470 were amongst others, co-stimulatory (*LTA/TNFRSF1A* or *TNFRSF1B* or *TNFRSF14*,  
471 *TNFSF10/TNFRSF10B*) or tissue-repair factors (*CSF1/CSF1R*, *TGFR3/TGFB1*, *IL15RA/IL15*),  
472 mediators of T-cell homeostasis and cytotoxicity (*FASLG/FAS*) and antiviral immune surveillance  
473 (*NKG2D II receptor/MICB* or *MICA*).

474

## 475 **DISCUSSION**

476 Based on scRNA-seq data obtained from BAL fluid, we were able to perform deep-immune  
477 profiling of the adaptive and innate immune cell landscape within the main locale of COVID-19  
478 pathology. A particular strength of our study is the profiling of BAL from a fairly large cohort of  
479 COVID-19 patients (n=31), enabling statistically meaningful and robust comparisons between mild  
480 and critical disease severity subgroups (in contrast to initial COVID-19 publications that profiled  
481 <10 patients)<sup>7</sup>. Importantly, our control group also consisted of non-COVID-19 pneumonia cases  
482 (n=13), instead of healthy controls. Since the latter are likely to differ on almost every  
483 immunological parameter-level relative to COVID-19, our strategy enhances qualitative clarity of  
484 immunological conclusions. Finally, due to the fact that we profiled >116,000 single-cells, we could  
485 infer pseudotime trajectories for both T-cells and myeloid cells. Such method is particularly  
486 attractive since it allows modelling of gene expression changes along the inferred trajectories,

487 thereby generating data at a much greater resolution. Overall, this allowed us to draw the following  
488 key conclusions regarding what distinguishes a critical from a mild COVID-19 disease course:

489 Firstly, CD8<sup>+</sup> T-cells exhibited good effector functions along their resident-memory and partially-  
490 exhausted lineages in mild COVID-19, while also CD4<sup>+</sup> T-cells showed increased effector or  
491 disease-resolving functions in T<sub>HI</sub>- and T<sub>HI17</sub>-lineages. In critical COVID-19, T-cells were highly  
492 dysregulated, either failing to differentiate (T<sub>I7</sub>- and T<sub>RM</sub>-lineage) or exhausting excessively, thereby  
493 leading to metabolic disparities, dysregulation of their immunological interface with myeloid cells  
494 and/or a dysregulated chronic hyper-inflammatory phenotype (T<sub>HI</sub> and T<sub>EX</sub>-lineage). Notably, we  
495 observed that mild *versus* critical COVID-19, not only differed quantitatively in terms of the number  
496 of T-cells exhibiting a good T-cell effector function, but also qualitatively, in terms of consistently  
497 lower activation levels of the type I and II IFN (anti-viral) signalling pathways (amongst several  
498 other pathways). Overall, this showed that T-cells in mild COVID-19, unlike those in critical  
499 COVID-19, were cross-talking better with their lung-localised microenvironment thereby  
500 facilitating 'ordered' immune reactions capable of resolving, rather than exacerbating, inflammation  
501 and tissue repair <sup>35</sup>.

502 Secondly, in mild COVID-19 monocytes exhibited a pronounced pro-inflammatory phenotype, but  
503 then differentiated into macrophages characterized by anti-inflammatory, pro-phagocytic and  
504 antigen-presentation facilitating functions. This suggests that in these patients, macrophages might  
505 be immunologically 'silently' cleaning the dying/dead epithelial cells (as well as other immune cells  
506 meeting their demise due to inflammation), hence contributing to degradation and dilution of the  
507 viral load in COVID-19 BAL. Such pro-homeostatic activity of macrophages is well-established to  
508 aid in disease amelioration and inflammation resolution<sup>36</sup>. In critical COVID-19, monocytes were  
509 instead characterized by a chronically hyper-inflamed phenotype with characteristics of an ATP-  
510 inflammasome-purinergic signalling-based fibrosis, which can promote worse disease outcome by  
511 contributing to development of ARDS. This danger signalling pathway is hypothesized to be part  
512 of the chronology of events during SARS-CoV-2 infection, but its genetic footprints have not been  
513 documented as we report here<sup>37</sup>. Considering that fully-differentiated macrophages are much more  
514 efficient in clearing large debris or cellular corpses (e.g. infected dead/dying lung epithelia or dead  
515 neutrophils) than monocytes or neutrophils, their dysfunction in critical COVID-19 may explain  
516 the excessive accumulation of lung epithelial (as well as dead immune cell) debris and alveolar  
517 dyshomeostasis coupled with dysregulated coagulopathy<sup>38-42</sup>.



518 Lastly, based on the presence of sequencing reads mapping to the gene encoding for viral protein  
519 S, which is needed to infect cells via ACE2 and TMPRSS2 receptors, we propose that SARS-CoV-  
520 2 largely infects epithelial cells (as primary targets of excessive pathological replication and  
521 propagation), but not necessarily lymphoid or myeloid cells (although we cannot exclude yet that  
522 some virions might be capable of ‘latently’ entering these cells without showing pathological  
523 replication or propagation). Interestingly, we also detected reads mapping to the nucleocapsid  
524 protein (N) encoding gene mainly in neutrophils, but to some extent also in other lymphoid or  
525 myeloid cells, especially monocytes. This suggests that neutrophils might be heavily involved in viral  
526 clearance of SARS-CoV-2 – as is the case in most viral pathologies<sup>29</sup>. Indeed, we observed that  
527 ‘inflammatory mature’ neutrophils, which exhibited an anti-pathogenic orientation with  
528 pronounced degranulating activity, contained most of the viral N sequences (amongst all other  
529 neutrophil phenotypes). Moreover, N-positive neutrophils exhibited increased expression of IFN-  
530 induced (anti-viral) genes, compared to N-negative neutrophils. Some sequencing reads also  
531 mapped to *ORF10* and *ORF1ab*, but not the other viral protein-encoding genes. We suspect this is  
532 due to increased stability of N, *ORF10* and *ORF1ab* RNA compared to other viral ORFs. In  
533 conclusion, these data suggest that the neutrophil’s positioning in an immune-inhibitory (adverse)  
534 environment, with disrupted T-cell effector/regulatory function as well as mostly inhibitory or  
535 dysregulated interactions with other (myeloid) immune cells, might explain their failure in  
536 controlling disease progression, thereby leading to critical COVID-19 pathology.

537 Our findings bear important therapeutic relevance. The RECOVERY trial recently claimed that  
538 dexamethasone reduces death by one-third in hospitalised patients with critical COVID-19  
539 (unpublished data). Dexamethasone has indeed been shown to dampen myeloid inflammatory  
540 signalling (notably IL-1 and IL-6 release), reduce neutrophil inflammation<sup>43</sup>, promote an ‘M2-like’  
541 macrophage phenotype, which has anti-inflammatory and phagocytic traits<sup>44</sup>, as well as to maintain  
542 clonal balance in T-cells<sup>45</sup>. Given the findings we report here, the therapeutic effects of  
543 dexamethasone are not entirely unexpected. Our data also suggest that neutrophils are key players  
544 in the acute phase of the infection. However, prolonged neutrophil inflammation might also cause  
545 excessive collateral lung damage and be detrimental to the host, as suggested by autopsy reports<sup>46</sup>.  
546 In this regard, the immunomodulatory antibiotic azithromycin might be a promising therapy for  
547 COVID-19 when administered early in the disease course. Acutely administered azithromycin  
548 enhances degranulation and the oxidative burst by neutrophils in response to a stimulus, yet this  
549 is followed by a subsequent decrease of oxidative burst capacity and increase in neutrophil

550 apoptosis<sup>47</sup>. We are therefore eagerly awaiting results from large-scale randomised trials with  
551 azithromycin for COVID-19.

552 Nevertheless, there are also limitations to our study. For instance, we observed evidence of  
553 counter-productive (possibly low-quality) antibody response-related signatures in COVID-19, but  
554 failed to perform an in-depth study in this area. Additional studies performing scRNA- and scBCR-  
555 seq on serially-collected samples during disease are needed to reinforce this observation. Also,  
556 several COVID-19 patients were treated with the antiviral drugs remdesivir, which targets the viral  
557 RNA-dependent RNA polymerase, or hydroxychloroquine, which has immunomodulatory traits  
558 and is still controversial with respect to its therapeutic effects on disease outcome<sup>48-50</sup>. Of note,  
559 we did not detect major patient-specific cell clusters nor other type of outliers during our analyses.

560 In conclusion, we used single-cell transcriptomics to characterize the innate and adaptive lung  
561 immune response to SARS-CoV-2. We observed marked changes in the immune cell compositions,  
562 phenotypes as well as immune cross-talks during SARS-CoV-2 infection and identified several  
563 distinguishing immunological features of mild *versus* critical COVID-19. We also documented  
564 genetic footprints of several crucial immunological pathways that have been extensively  
565 hypothesized, but not always systematically confirmed, to be associated with COVID-19 pathology  
566 and SARS-CoV-2 infection biology. We believe that this work represents a major resource for  
567 understanding lung-localised immunity during COVID-19 and holds great promise for the study of  
568 COVID-19 immunology, immune-monitoring of COVID-19 patients and relevant therapeutic  
569 development.

570

## 571 **MATERIALS AND METHODS**

572

### 573 *Patient cohort, sampling and data collection*

574 22 COVID-19 patients and 13 non-COVID-19 pneumonitis patients in this study were enrolled  
575 from the University Hospitals Leuven, between March 31<sup>th</sup> 2020 and May 4<sup>th</sup> 2020. Disease severity  
576 was defined as ‘mild’ or ‘critical’, based on the level of respiratory support at the time of sampling.  
577 Specifically, ‘mild’ patients required no respiratory support or supplemental oxygen through a nasal  
578 cannula, whereas ‘critically ill’ patients were mechanically ventilated or received extracorporeal  
579 membrane oxygenation.

580 The demographic and disease characteristics of the prospectively recruited patients studied by  
581 scRNA-seq are listed in Supplementary Table I. Diagnosis of COVID-19 was based on clinical  
582 symptoms, chest imaging and SARS-CoV-2 RNA-positive testing (qRT-PCR) on a nasopharyngeal  
583 swab and/or BAL fluid sample. Non-COVID-19 pneumonitis cases all tested negative for SARS-  
584 CoV-2 RNA using a qRT-PCR assay on BAL.

585 All 35 patients underwent bronchoscopy with BAL as part of the standard of medical care, because  
586 of i) high clinical suspicion of COVID-19 yet negative SARS-CoV-2 qRT-PCR on nasopharyngeal  
587 swab ii) established COVID-19 with clinical deterioration, to rule out opportunistic (co-)infection  
588 and/or to remove mucus plugs. Lavage was performed instilling 20cc of sterile saline, with an  
589 approximate retrieval of 10cc. 2-3cc of the retrieved volume was used for clinical purposes. The  
590 remaining fraction was used for scRNA-seq.

591 The retrieved BAL volume was separated into two aliquots, as explained above, at the bedside by  
592 the performing endoscopist. The aliquot used for scRNA-seq was immediately put on ice and  
593 transported to a Biosafety Level 3 Laboratory (REGA Institute, KU Leuven) for scRNA-seq.

594 Demographic, clinical, treatment and outcome data from patient electronic medical records were  
595 obtained through a standardized research form in Research Electronic Data Capture Software  
596 (REDCAP, Vanderbilt University). This study was conducted according to the principles expressed  
597 in the Declaration of Helsinki. Ethical approval was obtained from the Research Ethics Committee  
598 of KU / UZ Leuven (S63881). All participants provided written informed consent for sample  
599 collection and subsequent analyses.

### 600 *scRNA-seq, scTCR-seq and scBCR-seq profiling*

601 BAL fluid was centrifuged and the supernatant was frozen at -80°C for further experiments. The  
602 cellular fraction was resuspended in ice-cold PBS and samples were filtered using a 40µm nylon  
603 mesh (ThermoFisher Scientific). Following centrifugation, the supernatant was decanted and

604 discarded, and the cell pellet was resuspended in red blood cell lysis buffer. Following a 5-min  
605 incubation at room temperature, samples were centrifuged and resuspended in PBS containing  
606 UltraPure BSA (AM2616, ThermoFisher Scientific) and filtered over Flowmi 40µm cell strainers  
607 (VWR) using wide-bore 1 ml low-retention filter tips (Mettler-Toledo). Next, 10 µl of this cell  
608 suspension was counted using an automated cell counter to determine the concentration of live  
609 cells. The entire procedure was completed in less than 1.5 h.

610 Single-cell TCR/BCR and 5' gene expression sequencing data for the same set of cells were  
611 obtained from the single-cell suspension using the Chromium™ Single Cell 5' library and Gel Bead  
612 & Multiplex Kit with the Single Cell V(D)J Solution from 10x Genomics according to the  
613 manufacturer's instructions. Up to 5,000 cells were loaded on a 10x Genomics cartridge for each  
614 sample. Cell-barcoded 5' gene expression libraries were sequenced on an Illumina NovaSeq6000,  
615 and mapped to the GRCh38 human reference genome using Cell Ranger (10x Genomics, v3.1).  
616 V(D)J enriched libraries were sequenced on an Illumina HiSeq4000 and TCR and BCR alignment  
617 and annotation was achieved with Cell Ranger VDJ (10x Genomics, v3.1).

#### 618 *Single-cell gene expression analysis*

619 Raw gene expression matrices generated per sample were merged and analysed with the Seurat  
620 package (v3.1.4)<sup>51</sup>. Cell matrices were filtered by removing cell barcodes with <301 UMIs, <151  
621 expressed genes or >20% of reads mapping to mitochondrial RNA. We opted for a lenient filtering  
622 strategy to preserve the neutrophils, which are transcriptionally less active (lower transcripts and  
623 genes detected). The remaining cells were normalized and the 3000 most variable genes were  
624 selected to perform a PCA analysis after regression for confounding factors: number of UMIs,  
625 percentage of mitochondrial RNA, patient ID and cell cycle (S and G2M phase scores calculated  
626 by the CellCycleScoring function in Seurat), interferon response (BROWNE\_INTERFERON\_RE-  
627 SPONSIVE\_GENES in the Molecular Signatures Database or MSigDB v6.2), sample dissociation-  
628 induced stress signatures<sup>52</sup>, hypoxia signature<sup>53</sup>. This PCA and graph-based clustering approach  
629 however resulted in some highly patient specific clusters, which prompted us to perform data  
630 integration using anchor-based CCA in Seurat (v3) package between patients to reduce the patient-  
631 specific bias. And this was performed after excluding cells from an erythrocyte cluster (primarily  
632 from a single patient) and a low-quality cell cluster. After data integration, 3000 most variable genes  
633 were calculated by FindVariableFeatures function, and all the mitochondrial, cell cycle, hypoxia,  
634 stress and interferon response genes (Pearson correlation coefficient > 0.1 against scores of the  
635 above-mentioned signatures calculated by AddModuleScore function in Seurat) were removed  
636 from the variable genes. In addition, we also removed common ambient RNA contaminant genes,

637 including hemoglobin and immunoglobulin genes, as well as T-cell receptor (TRAVs, TRBV,  
638 TRDV, TRGV) and B-cell receptor (IGLVs, IGKV, IGHV) genes, before downstream analyses.

#### 639 *scRNA-seq clustering for cell type identification*

640 For the clustering of all cell types, principal component analysis (PCA) was applied to the variable  
641 genes of dataset to reduce dimensionality. The selection of principal components was based on  
642 elbow and Jackstraw plots (usually 25-30). Clusters were calculated by the FindClusters function  
643 with a resolution between 0.2 and 2, and visualised using the Uniform Manifold Approximation and  
644 Projection for Dimension Reduction (UMAP) reduction. Differential gene-expression analysis was  
645 performed for clusters generated at various resolutions by both the Wilcoxon rank sum test and  
646 Model-based Analysis of Single-cell Transcriptomics (MAST) using the FindMarkers function<sup>51</sup>. A  
647 specific resolution was selected when known cell types were identified as a cluster at a given  
648 resolution, but not at a lower resolution with the minimal constraint that each cluster has at least  
649 10 significantly differentially expressed genes (FDR <0.01, 2-fold difference in expression compared  
650 to all other clusters). Annotation of the resulting clusters to cell types was based on the expression  
651 of marker genes.

#### 652 *Integration of publicly available datasets and identification of cell subtypes*

653 We additionally processed scRNA-seq data on COVID-19 BAL fluid by Liao et al. and on normal  
654 lung samples by Reyfman et al. and Lambrechts et al. as described above<sup>7,9,10</sup>. The former two  
655 datasets were *de novo* clustered and annotated, and cell type annotation of the last dataset was  
656 used as previously described<sup>11</sup>. For cell subtype identification, the main cell types identified from  
657 multiple datasets were pooled, integrated, and further subclustered using the similar strategy,  
658 except that the constant immunoglobulin genes were not excluded for B-cell and plasma cell  
659 subclustering. Finally, doublet clusters were identified based on: 1) expression of marker genes  
660 from other cell (sub)clusters, 2) higher average UMIs as compared to other (sub)clusters, and 3) a  
661 higher than expected doublets rate (> 20%), as predicted by both DoubletFinder (v2)<sup>54</sup> and  
662 Scrublet<sup>55</sup> and the clustering was re-performed in the absence of the doublet clusters.

#### 663 *Trajectory inference analysis*

664 The R package Slingshot was used to explore pseudotime trajectories/potential lineages in T- and  
665 myeloid cells<sup>56</sup>. The analyses were performed for CD8<sup>+</sup> and CD4<sup>+</sup> cell phenotypes separately, with  
666 T<sub>MAIT</sub><sup>+</sup>, T<sub>V $\delta$</sub> <sup>-</sup> and T<sub>REG</sub>-cells excluded due to their unique developmental origin. For each analysis,  
667 PCA-based dimension reduction was performed with differentially expressed genes of each  
668 phenotype, followed by two-dimensional visualization with UMAP. Graph-based clustering (Louvain)

669 identified additional heterogeneity for some phenotypes, as described in the manuscript for CD4<sup>+</sup>  
670 T-cells. Next, this UMAP matrix was fed into SlingShot, with naïve T-cells as a root state for  
671 calculation of lineages and pseudotime. Similar approach was applied to the monocyte-macrophage  
672 differentiation trajectory inferences.

#### 673 *Assessing the TCR and BCR repertoires*

674 We only considered productive TCR/BCRs, which were assigned by the CellRanger VDJ pipeline.  
675 Relative clonotype richness<sup>57</sup>, defined as the number of unique TCRs/BCRs divided by the total  
676 number of cells with a unique TCR/BCR, was calculated to assess clonotype diversity. Relative  
677 clonotype evenness<sup>58</sup>, was defined as inverse Simpson index divided by species richness (number  
678 of unique clonotypes).

#### 679 *Inflammatory pathways and gene set enrichment analysis and tradeSeq*

680 The REACTOME pathway activity of individual cells was calculated by AUCell package (v1.2.4)<sup>59</sup>.  
681 And the differential activity between lineages along the trajectories were calculated using  
682 TradeSeq<sup>60</sup>. Pathways with median fold change >3 and an adjusted p-value < 0.01 were considered  
683 as significantly changed. GO and REACTOME geneset enrichment analysis were performed using  
684 hypeR package<sup>61</sup>; geneset over-representation was determined by hypergeometric test.

#### 685 *SARS-CoV-2 viral sequence detection*

686 Viral-Track was used to detect SARS-CoV-2 reads from BAL scRNA-seq data (reference  
687 genome NC\_045512.2), as previously described<sup>8</sup>. The initial application was aimed to identify  
688 SARS-CoV-2 reads against thousands of other viruses, and thus the STAR indexes for read  
689 alignment were built by combining the human (GRCh38) genome reference with thousands of virus  
690 reference genomes from viruSITE. Since the likelihood of co-infection with multiple viruses (>2) is  
691 low in COVID-19 patients<sup>8</sup>, we adapted the Viral-Track pipeline to reduce computation time and  
692 increase sensitivity. Briefly, instead of directly processing raw fastq reads, we took advantage of  
693 BAM reads generated for scRNA-seq data, which mapped to human genome by the CellRanger  
694 pipeline as described above. The BAM files were filtered to only keep reads with cell barcodes  
695 annotated in the scRNA-seq analysis using subset-bam tools (10x Genomics). Then the  
696 corresponding unmapped BAM reads were extracted using samtools and converted to fastq files  
697 using bamtofastq tool to be further processed by UMI-tools for cell barcode assignment before  
698 feeding into Viral-Track pipeline. These unmapped reads, which contain potential viral sequences,  
699 were aligned using STAR to SARS-CoV-2 reference genome, with less stringent mapping parameter  
700 (outFilterMatchNmin 25-30), as compared to the original Viral-Track pipeline. Our approach

701 identified 17 SARS-CoV-2 positive patients from a total of 31 COVID-19 patients, including 3  
702 patients that were previously not detected using original Viral-Track pipeline by Bost et al. None  
703 of the patients among the 13 non-COVID-19 patients were detected as SARS-CoV-2 positive,  
704 suggesting our adapted pipeline does not result in major false-positive detection. For the detection  
705 of 11 SARS-CoV-2 ORFs or genes, a GTF annotation file was generated according to  
706 NC\_045512.2<sup>62</sup> for counts matrix using Viral-Track. The viral gene counts of each barcoded cells  
707 were integrated into the scRNA-seq gene count matrix and normalized together using  
708 `NormalizeData` function in Seurat.

#### 709 *Cell-to-cell communication of scRNA-seq data*

710 The CellPhoneDB algorithm was used to infer cell-to-cell interactions<sup>63</sup>. Briefly, the algorithm  
711 allows to detect ligand-receptor interactions between cell types in scRNA-seq data. We assessed  
712 the amount of interactions that are shared and specific for i) COVID-19 versus non-COVID-19 and  
713 ii) mild versus critical COVID-19.

#### 714 *Quantification and statistical analysis*

715 Descriptive statistics are presented as median [interquartile range; IQR] (or median [range] if  
716 dataset contained only 2 variables) and n (%) for continuous and categorical variables, respectively.  
717 Statistical analyses were performed using R (version 3.6.3, R Foundation for Statistical Computing,  
718 R Core Team, Vienna, Austria). Statistical analyses were performed with a two-sided alternative  
719 hypothesis at the 5% significance level.

#### 720 **DATA AVAILABILITY**

721 Raw sequencing reads of the scRNA-seq and scTCR-seq experiments generated for this study will  
722 be deposited in the EGA European Genome-Phenome Archive database. Based on SCoPe, which  
723 is an interactive web server for scRNA-seq data visualisation, a download of the read count matrix  
724 will be made available at <http://blueprint.lambrechtslab.org>. The publicly available datasets that  
725 supported this study are available from GEO GSE145926<sup>7</sup>, GEO GSE122960<sup>10</sup> and from  
726 ArrayExpress E-MTAB-6149/E-MTAB-6653<sup>9</sup>.

727

#### 728 **ADDITIONAL RESOURCES**

729 The findings outlined above are part of the COntAGlouS observational clinical trial:  
730 <https://clinicaltrials.gov/ct2/show/NCT04327570> .

#### 731 **ACKNOWLEDGEMENTS**

732 This project has received funding within the Grand Challenges Program of VIB. This VIB Program  
733 received support from the Flemish Government under the Management Agreement 2017-2021  
734 (VR 2016 2312 Doc.1521/4). ADG acknowledges the financial support from Research Foundation  
735 Flanders (FWO) (G0B4620N; EOS grant: 30837538), KU Leuven (C14/19/098; POR/16/040) and  
736 Kom op Tegen Kanker (KOTK/2018/11509/1). L.V. is supported by an FWO PhD fellowship (grant  
737 number 11E9819N). P.V.M. is supported by an FWO PhD fellowship (grant number 1S66020N).  
738 E.W. is supported by Stichting tegen Kanker (Mandate for basic & clinical oncology research). J.W.  
739 is supported by an FWO Fundamental Clinical Mandate (1833317N).

740 We thank Dr. Wynand Van Rompaey, Dr. Julie Van Maercke, Dr. Nico De Crem, Dr. Sigurd  
741 Ghekiere and Dr. Thomas Demuynck for their help in patient recruitment and sample collection.

742

#### 743 **AUTHORS CONTRIBUTIONS**

744 E.W., P.V.M., A.D.G., J.W., D.L. and J.Q. designed the experiments, developed the methodology,  
745 analysed and interpreted data and wrote the manuscript. S.J. and J.N. designed the experiments,  
746 developed the methodology and performed experiments. Y.V.H. and L.V. designed the experiments,  
747 collected and interpreted data. D.T., G.H., D.D., J.Y., J.G. and C.D. performed sample collection.  
748 A.B., B.B., B.M.D., P.M. and S.J. performed experiments and data analysis and interpretation. T.V.B.,  
749 R.S., T.V.B. and E.H. provided technical assistance and performed experiments. E.W. and J.W.  
750 supervised the clinical study design and were responsible for coordination and strategy. All authors  
751 have approved the final manuscript for publication.

#### 752 **CONFLICT OF INTEREST**

753 The authors declare no competing interests

#### 754 **CONTAGIOUS co-authors:**

755 Francesca Maria Bosisio, Michael Casaer, Frederik De Smet, Paul De Munter, Stephanie Humblet-  
756 Baron, Adrian Liston, Natalie Lorent, Kim Martinod, Paul Proost, Jeroen Raes, Karin Thevissen,  
757 Robin Vos, Birgit Weynand, Carine Wouters

758

759

760

761



## 762 References

763

- 764 1. World Health Organization. WHO Coronavirus Disease (COVID-19) Dashboard.  
765 <https://covid19.who.int/>
- 766 2. Fu, L. et al. Clinical characteristics of coronavirus disease 2019 (COVID-19) in China:  
767 A systematic review and meta-analysis. *J Infect.* **80**, 656–665 (2020).
- 768 3. Chen, G. et al. Clinical and immunological features of severe and moderate  
769 coronavirus disease 2019. *J. Clin. Invest.* **130**, 2620–2629 (2020).
- 770 4. Liu, K. et al. Clinical characteristics of novel coronavirus cases in tertiary hospitals in  
771 Hubei Province. *Chin. Med. J. (Engl.)*. **133**, 1025–1031 (2020).
- 772 5. Wen, W. et al. Immune cell profiling of COVID-19 patients in the recovery stage by  
773 single-cell sequencing. *Cell Discov.* **6**, (2020).
- 774 6. Wilk, A. J. et al. A single-cell atlas of the peripheral immune response to severe  
775 COVID-19. *Nat. Med.* (2020).
- 776 7. Liao, M. et al. Single-cell landscape of bronchoalveolar immune cells in patients with  
777 COVID-19. *Nat. Med.* (2020).
- 778 8. Bost, P. et al. Host-viral infection maps reveal signatures of severe COVID-19  
779 patients. *Cell* 1–14 (2020).
- 780 9. Lambrechts, D. et al. Phenotype molding of stromal cells in the lung tumor  
781 microenvironment. *Nat. Med.* **24**, 1277–1289 (2018).
- 782 10. Reyfman, P. A. et al. Single-cell transcriptomic analysis of human lung provides insights  
783 into the pathobiology of pulmonary fibrosis. *Am. J. Respir. Crit. Care Med.* **199**, 1517–  
784 1536 (2019).
- 785 11. Qian, J. et al. A Pan-cancer Blueprint of the Heterogeneous Tumour  
786 Microenvironment Revealed by Single-Cell Profiling. *Cell Res.* (2020).
- 787 12. Garg, A. D. & Agostinis, P. Cell death and immunity in cancer: From danger signals to  
788 mimicry of pathogen defense responses. *Immunol. Rev.* **280**, 126–148 (2017).
- 789 13. Van Driel, B. J., Liao, G., Engel, P. & Terhorst, C. Responses to microbial challenges  
790 by SLAMF receptors. *Front. Immunol.* **7**, 1–14 (2016).
- 791 14. Wherry, E. J. et al. Molecular Signature of CD8+ T Cell Exhaustion during Chronic  
792 Viral Infection. *Immunity* **27**, 670–684 (2007).
- 793 15. Wang, W. H. et al. The role of galectins in virus infection - A systemic literature  
794 review. *J. Microbiol. Immunol. Infect.* (2019) doi:10.1016/j.jmii.2019.09.005.
- 795 16. Liu, W. et al. Tim-4 in Health and Disease: Friend or Foe? *Front. Immunol.* **11**, 1–10  
796 (2020).
- 797 17. Waite, J. C. & Skokos, D. Th17 response and inflammatory autoimmune diseases. *Int.*  
798 *J. Inflam.* **2012**, (2012).
- 799 18. Chechlinska, M. et al. Molecular signature of cell cycle exit induced in human T  
800 lymphoblasts by IL-2 withdrawal. *BMC Genomics* **10**, (2009).
- 801 19. Miyazaki, Y., Chen, L. C., Chu, B. W., Swigut, T. & Wandless, T. J. Distinct  
802 transcriptional responses elicited by unfolded nuclear or cytoplasmic protein in  
803 mammalian cells. *Elife* **4**, 1–24 (2015).
- 804 20. Willingham, S. B. et al. The CD47-signal regulatory protein alpha (SIRPα) interaction is  
805 a therapeutic target for human solid tumors. *Proc. Natl. Acad. Sci. U. S. A.* **109**, 6662–  
806 6667 (2012).
- 807 21. Garg, A. D., Romano, E., Rufo, N. & Agostinis, P. Immunogenic versus tolerogenic  
808 phagocytosis during anticancer therapy: Mechanisms and clinical translation. *Cell Death*  
809 *Differ.* **23**, 938–951 (2016).
- 810 22. Cauwels, A., Rogge, E., Vandendriessche, B., Shiva, S. & Brouckaert, P. Extracellular  
811 ATP drives systemic inflammation, tissue damage and mortality. *Cell Death Dis.* **5**, 1–7

- 812 (2014).
- 813 23. Krysko, D. V. *et al.* Emerging role of damage-associated molecular patterns derived  
814 from mitochondria in inflammation. *Trends Immunol.* **32**, 157–164 (2011).
- 815 24. Riteau, N. *et al.* Extracellular ATP is a danger signal activating P2X7 receptor in lung  
816 inflammation and fibrosis. *Am. J. Respir. Crit. Care Med.* **182**, 774–783 (2010).
- 817 25. Gavin, C. *et al.* The Complement System Is Essential for the Phagocytosis of  
818 Mesenchymal Stromal Cells by Monocytes. *Front. Immunol.* **10**, (2019).
- 819 26. Tippett, E., Cameron, P. U., Marsh, M. & Crowe, S. M. Characterization of  
820 tetraspanins CD9, CD53, CD63, and CD81 in monocytes and macrophages in HIV-1  
821 infection. *J. Leukoc. Biol.* **93**, 913–920 (2013).
- 822 27. Lévesque, S. A., Kukulski, F., Enyoloji, K., Robson, S. C. & Sévigny, J. NTPDase I  
823 governs P2X7-dependent functions in murine macrophages. *Eur. J. Immunol.* **40**, 1473–  
824 1485 (2010).
- 825 28. Garg, A. D. *et al.* Pathogen response-like recruitment and activation of neutrophils by  
826 sterile immunogenic dying cells drives neutrophil-mediated residual cell killing. *Cell*  
827 *Death Differ.* **24**, 832–843 (2017).
- 828 29. Galani, I. E. & Andreakos, E. Neutrophils in viral infections: Current concepts and  
829 caveats. *J. Leukoc. Biol.* **98**, 557–564 (2015).
- 830 30. Laghlali, G., Lawlor, K. E. & Tate, M. D. Die another way: Interplay between influenza  
831 A virus, inflammation and cell death. *Viruses* **12**, 1–23 (2020).
- 832 31. Zheng, S. *et al.* Viral load dynamics and disease severity in patients infected with  
833 SARS-CoV-2 in Zhejiang province, China, January-March 2020: Retrospective cohort  
834 study. *BMJ* **369**, 1–8 (2020).
- 835 32. Dick, J. *et al.* C5a receptor 1 promotes autoimmunity, neutrophil dysfunction and  
836 injury in experimental anti-myeloperoxidase glomerulonephritis. *Kidney Int.* **93**, 615–  
837 625 (2018).
- 838 33. Leitner, J., Herndler-Brandstetter, D., Zlabinger, G. J., Grubeck-Loebenstern, B. &  
839 Steinberger, P. CD58/CD2 Is the Primary Costimulatory Pathway in Human CD28 –  
840 CD8 + T Cells. *J. Immunol.* **195**, 477–487 (2015).
- 841 34. Kaiser, B. K. *et al.* Interactions between NKG2x Immunoreceptors and HLA-E  
842 Ligands Display Overlapping Affinities and Thermodynamics. *J. Immunol.* **174**, 2878–  
843 2884 (2005).
- 844 35. Schett, G. & Neurath, M. F. Resolution of chronic inflammatory disease: universal and  
845 tissue-specific concepts. *Nat. Commun.* **9**, (2018).
- 846 36. Arandjelovic, S. & Ravichandran, K. S. Phagocytosis of apoptotic cells in homeostasis.  
847 *Nat. Immunol.* **16**, 907–917 (2015).
- 848 37. Tay, M. Z., Poh, C. M., Rénia, L., MacAry, P. A. & Ng, L. F. P. The trinity of COVID-  
849 19: immunity, inflammation and intervention. *Nat. Rev. Immunol.* **20**, 363–374 (2020).
- 850 38. Bratton, D. L. & Henson, P. M. Neutrophil clearance: When the party is over, clean-  
851 up begins. *Trends Immunol.* **32**, 350–357 (2011).
- 852 39. Hochreiter-hufford, A. & Ravichandran, K. S. Clearing the Dead : Apoptotic Cell  
853 Sensing. *Cold Spring Harb. Perspect. Biol.* **5**, a008748 (2013).
- 854 40. Merad, M. & Martin, J. C. Pathological inflammation in patients with COVID-19: a key  
855 role for monocytes and macrophages. *Nat. Rev. Immunol.* **20**, 355–362 (2020).
- 856 41. Jose, R. J. & Manuel, A. COVID-19 cytokine storm: the interplay between  
857 inflammation and coagulation. *Lancet Respir. Med.* **8**, e46–e47 (2020).
- 858 42. McGonagle, D., O'Donnell, J. S., Sharif, K., Emery, P. & Bridgewood, C. Immune  
859 mechanisms of pulmonary intravascular coagulopathy in COVID-19 pneumonia.  
860 *Lancet Rheumatol.* **2019**, 1–9 (2020).
- 861 43. Wan, T., Zhao, Y., Fan, F., Hu, R. & Jin, X. Dexamethasone inhibits *S. aureus*-induced

- 862 neutrophil extracellular pathogen-killing mechanism, possibly through toll-like  
863 receptor regulation. *Front. Immunol.* **8**, (2017).
- 864 44. Cain, D. W. & Cidlowski, J. A. Immune regulation by glucocorticoids. *Nat. Rev.*  
865 *Immunol.* **17**, 233–247 (2017).
- 866 45. Gutsol, A. A., Sokhonevich, N. A., Seledtsov, V. I. & Litvinova, L. S. Dexamethasone  
867 effects on activation and proliferation of immune memory T cells. *Bull. Exp. Biol. Med.*  
868 **155**, 474–476 (2013).
- 869 46. Barnes, B. J. *et al.* Targeting potential drivers of COVID-19: Neutrophil extracellular  
870 traps. *J. Exp. Med.* **217**, 1–7 (2020).
- 871 47. Uli, O. *et al.* Azithromycin modulates neutrophil function and circulating inflammatory  
872 mediators in healthy human subjects. *Eur. J. Pharmacol.* **450**, 277–289 (2002).
- 873 48. Geleris, J. *et al.* Observational Study of Hydroxychloroquine in Hospitalized Patients  
874 with Covid-19. *N. Engl. J. Med.* 1–8 (2020).
- 875 49. Schrezenmeier, E. & Dörner, T. Mechanisms of action of hydroxychloroquine and  
876 chloroquine: implications for rheumatology. *Nat. Rev. Rheumatol.* **16**, 155–166 (2020).
- 877 50. Grein, J. *et al.* Compassionate Use of Remdesivir for Patients with Severe Covid-19.  
878 *N. Engl. J. Med.* 2327–2336 (2020).
- 879 51. Stuart, T. *et al.* Comprehensive Integration of Single-Cell Data. *Cell* **177**, 1888-  
880 1902.e21 (2019).
- 881 52. Van Den Brink, S. C. *et al.* Single-cell sequencing reveals dissociation-induced gene  
882 expression in tissue subpopulations. *Nat. Methods* **14**, 935–936 (2017).
- 883 53. Buffa, F. M., Harris, A. L., West, C. M. & Miller, C. J. Large meta-analysis of multiple  
884 cancers reveals a common, compact and highly prognostic hypoxia metagene. *Br. J.*  
885 *Cancer* **102**, 428–435 (2010).
- 886 54. McGinnis, C. S., Murrow, L. M. & Gartner, Z. J. DoubletFinder: Doublet Detection in  
887 Single-Cell RNA Sequencing Data Using Artificial Nearest Neighbors. *Cell Syst.* **8**, 329-  
888 337.e4 (2019).
- 889 55. Wolock, S. L., Lopez, R. & Klein, A. M. Scrublet: Computational Identification of Cell  
890 Doublets in Single-Cell Transcriptomic Data. *Cell Syst.* **8**, 281-291.e9 (2019).
- 891 56. Street, K. *et al.* Slingshot: Cell lineage and pseudotime inference for single-cell  
892 transcriptomics. *BMC Genomics* **19**, (2018).
- 893 57. Zhu, W. *et al.* A high density of tertiary lymphoid structure B cells in lung tumors is  
894 associated with increased CD4+ T cell receptor repertoire clonality. *Oncoimmunology*  
895 **4**, (2015).
- 896 58. Robinson, J. P. W. *et al.* The limitations of diversity metrics in directing global marine  
897 conservation. *Mar. Policy* **48**, 123–125 (2014).
- 898 59. Aibar, S. *et al.* SCENIC: Single-cell regulatory network inference and clustering. *Nat.*  
899 *Methods* **14**, 1083–1086 (2017).
- 900 60. Van den Berge, K. *et al.* Trajectory-based differential expression analysis for single-cell  
901 sequencing data. *Nat. Commun.* **11**, 1–13 (2020).
- 902 61. Federico, A. & Monti, S. HypeR: An R package for geneset enrichment workflows.  
903 *Bioinformatics* **36**, 1307–1308 (2020).
- 904 62. Kim, D. *et al.* The Architecture of SARS-CoV-2 Transcriptome. *Cell* **181**, 914-921.e10  
905 (2020).
- 906 63. Efremova, M., Vento-Tormo, M., Teichmann, S. A. & Vento-Tormo, R. CellPhoneDB:  
907 inferring cell–cell communication from combined expression of multi-subunit ligand–  
908 receptor complexes. *Nat. Protoc.* **15**, 1484–1506 (2020).
- 909  
910

## 911 **Figure Legends**

912

### 913 **Fig. 1. Annotation of cell types by scRNA-seq in COVID-19 and non-COVID-19 BAL**

914 **a** UMAP representation of 65,166 cells (obtained from BAL from n=13 non-COVID-19, n=2 mild and n=22  
915 critical COVID-19 patients) by scRNA-seq color-coded for the indicated cell type. pDC: plasmacytoid  
916 dendritic cell, cDC: conventional dendritic cell, NK: natural-killer cell, Md\_Mac: monocyte-derived  
917 macrophage. Alveolar\_Mac: alveolar macrophage. AT2: alveolar type II epithelial cell. **b** UMAP panels  
918 stratified per individual patient, COVID-19 versus non-COVID-19 and mild versus critical COVID-19. **c**  
919 Relative contribution of each cell type (in %) in COVID-19 versus non-COVID-19. **d** Relative contribution  
920 of each cell type (in %) in mild versus critical COVID-19. P values were assessed by Mann-Whitney test. \*  
921 P<0.05, \*\* P<0.01, \*\*\*P<0.001

922

### 923 **Fig. 2. 14 T-cell phenotypes in mild and critical COVID-19 BAL**

924 **a** Subclustering of 23,468 T-/NK-cells into 14 T-/NK-cell phenotypes, as indicated by the color-coded  
925 legend. NK cyto: cytotoxic NK cell; NK inflam: inflammatory NK cell. **b** Heatmap showing T-/NK-cell  
926 phenotypes with corresponding marker genes and functional gene sets. **c** Relative contribution of each T-  
927 /NK-cell phenotype (in %) in COVID-19 versus non-COVID-19. **d** Relative contribution of each T-/NK-cell  
928 phenotype (in %) in mild versus critical COVID-19. P values were assessed by Mann-Whitney test. \* P<0.05,  
929 \*\* P<0.01, \*\*\*P<0.001

930

### 931 **Fig. 3. CD8<sup>+</sup> T-cell phenotypes in mild and critical COVID-19 BAL**

932 **a** Pseudotime trajectories for CD8<sup>+</sup> T-cells based on Slingshot, showing 3 lineages (T<sub>RM</sub>-lineage, T<sub>EX</sub>-lineage  
933 and T<sub>EMRA</sub>-lineage), color-coded for the CD8<sup>+</sup> T-cell phenotypes (left panel), the pseudotime (middle panel)  
934 and the number of clonotypes (right panel). **b** Profiling of marker genes along these trajectories to confirm  
935 their functional annotation: *ZNF683* and *ITGAE* for the T<sub>RM</sub>-lineage, *HAVCR2* and *CTLA4* for the T<sub>EX</sub>-lineage,  
936 *FGFBP2* and *CX3CR1* for the T<sub>EMRA</sub>-lineage. **c** Genes involved in T-cell effector function and cytotoxicity  
937 (*GZMB*, *IFNG*, *GZMB*, *GZMB*, *GZMB*) and related transcription factor (*TOX2*) modelled along the CD8<sup>+</sup> T-cell lineages. **d**  
938 Density plots reflecting the number of T-cells along the 3 CD8<sup>+</sup> T-cell lineages. **e** Density plots reflecting  
939 the number of T-cells along the 3 CD8<sup>+</sup> T-cell lineages stratified for non-COVID-19, COVID-19 and normal  
940 lung. **f** Density plots reflecting the number of T-cells along the 3 CD8<sup>+</sup> T-cell lineages stratified for mild  
941 versus critical COVID-19. **g** Analysis of clonotype sharing (thickness indicates proportion of sharing)  
942 between the CD8<sup>+</sup> T-cells. **h-i** TCR richness and TCR evenness along the 3 T-cell lineages for non-COVID-  
943 19 versus COVID-19 (**h**), and mild versus critical COVID-19 (**i**). **j-k** Gene expression dynamics along the  
944 CD8<sup>+</sup> T<sub>RM</sub>- (**j**) and T<sub>EX</sub>-lineage (**k**). Genes cluster into 5 gene sets, each of them characterized by specific  
945 expression profiles, as depicted by a selection of marker gene characteristic for each set. Differences in  
946 trajectories were assessed by Mann-Whitney test. For CD8<sup>+</sup> T<sub>RM</sub>: COVID-19 versus non-COVID-19 (P  
947 =1.0E-6), mild versus critical COVID-19 (P=5.9E-102). For CD8<sup>+</sup> T<sub>EX</sub>: COVID-19 versus non-COVID-19 and  
948 normal lung (P=2.3E-67), mild versus critical (P=1.1E-39). For CD8<sup>+</sup> T<sub>EMRA</sub>: normal lung versus COVID-19  
949 and non-COVID-19 (P=3.8E-39).

950

### 951 **Fig. 4. CD4<sup>+</sup> T-cell developmental trajectories in mild and critical COVID-19 BAL**

952 **a** UMAP with pseudotime trajectories based on Slingshot, showing 3 lineages (T<sub>HI</sub>-lineage, T<sub>HI7</sub>-lineage and  
953 T<sub>SCM</sub>-lineage), color-coded for the CD4<sup>+</sup> T-cell phenotypes (left), the pseudotime (middle) and the number  
954 of clonotypes (right). **b** Naïve and memory-related marker gene expression (left), and cell cycle scoring  
955 (right) reveal additional CD4<sup>+</sup> T-cell subclusters. T<sub>SCM</sub>-cells are characterized by naïve marker genes (*CCR7*,  
956 *TCF7*), memory markers (*CD27*), cell proliferation but no *GZMA* expression. **c** Analysis of clonotype sharing  
957 (thickness indicates proportion of sharing) between the CD4<sup>+</sup> T-cell subclusters. **d** Profiling of marker genes  
958 along these trajectories to confirm their functional annotation: *GZMB* and *IFNG* for the T<sub>HI</sub>-lineage, *IL17A*  
959 and *RORC* for the T<sub>HI7</sub>-lineage, *TCF7* and *CCR7* for the T<sub>SCM</sub>-lineage, while *GZMB* and *PRFI* were plotted to

960 highlighted T-cell effector function. **e** Density plots reflecting the number of T-cells along the 3 CD4<sup>+</sup> T-cell  
961 lineages stratified for non-COVID-19, COVID-19 and normal lung. **f** Density plots reflecting the number of  
962 T-cells along the 3 CD4<sup>+</sup> T-cell lineages stratified for mild versus critical COVID-19. **g-h** TCR richness and  
963 TCR evenness along the 3 CD4<sup>+</sup> T-cell lineages comparing non-COVID-19 versus COVID-19 (**g**) and mild  
964 versus critical COVID-19 (**h**). **i-j** Gene expression dynamics along the CD4<sup>+</sup> T<sub>H1</sub>- (**i**) and T<sub>H17</sub>-lineage (**j**).  
965 Genes cluster into 5 gene sets, each of them characterized by specific expression profiles, as depicted by a  
966 selection of marker genes characteristic for each set. Differences in trajectories were assessed by Mann-  
967 Whitney test. For CD4<sup>+</sup> T<sub>H1</sub> and CD4<sup>+</sup> T<sub>SCM</sub>: COVID-19 versus non-COVID-19 and lung normal (P = 1.4E-6  
968 and 5.9E-37), For CD4<sup>+</sup> T<sub>H17</sub>: COVID-19 versus non-COVID-19 (P=9.7E-12), mild versus critical COVID-  
969 19 (P=1.3E-121).  
970

## 971 **Fig. 5. Monocyte-to-macrophage differentiation in COVID-19 BAL**

972 **a** Subclustering of myeloid cells into 9 phenotypes, as indicated by the color-coded legend. **b** Heatmap  
973 showing myeloid cell phenotypes with corresponding functional gene sets. **c** Relative contribution of each  
974 cell type (in %) to COVID-19 versus non-COVID-19 BAL. **d** Relative contribution of each cell type (in %) to  
975 mild versus critical COVID-19 BAL. **e** Pseudotime trajectories for myeloid cells based on Slingshot, showing  
976 the common branch of FCN1<sup>hi</sup> monocytes differentiating into either RGS1<sup>hi</sup> monocyte-derived macrophages  
977 (RGS1<sup>hi</sup>-lineage) or FABP4<sup>hi</sup> tissue-resident alveolar macrophages (alveolar lineage). **f** Profiling of marker  
978 genes along these trajectories to confirm their functional annotation: *FCN1*, *S100A12*, *CCL2*, *CCL18* for the  
979 common branch, *FABP4* and *PPARG* for the alveolar lineage, *RGS1* and *GPR183* for the RGS1-lineage. **g**  
980 Density plots reflecting the number of myeloid cells along the 2 lineages stratified for non-COVID-19 versus  
981 COVID-19. **h** Density plots reflecting the number of myeloid cells along the 2 lineages stratified for mild  
982 versus critical COVID-19. **i** Gene expression dynamics along the alveolar lineage. Genes cluster into 5 gene  
983 sets, each of them characterized by specific expression profiles, as depicted by a selection of genes  
984 characteristic for each cluster. **j-l** Profiling of IFN type I and II signalling along the 3 CD8<sup>+</sup> (**j**) and CD4<sup>+</sup> (**k**)  
985 T-cell lineages, and along the monocyte-macrophage lineage (**l**), comparing mild versus critical COVID-19.  
986 All P values were assessed by a Mann-Whitney test. \* P<0.05, \*\* P<0.01, \*\*\*P<0.001. P values comparing  
987 COVID-19 versus non-COVID-19, and mild versus critical COVID-19 for density plots were all <10E-50.  
988

## 989 **Fig. 6. Neutrophil, dendritic cell and B-cell phenotypes in COVID-19 BAL**

990 **a** Subclustering of neutrophils into 5 phenotypes, as indicated by the color-coded legend. **b** UMAP showing  
991 expression of a marker gene for each neutrophil phenotype. **c** Heatmap showing neutrophil phenotypes  
992 with corresponding marker genes and functional gene sets. **d** Relative contribution of each neutrophil  
993 phenotype (in %) to COVID-19 versus non-COVID-19. **e** Relative contribution of each neutrophil phenotype  
994 (in %) to mild versus critical COVID-19. **f** Subclustering of DC into 6 phenotypes, as indicated by the color-  
995 coded legend. **g** Heatmap showing DC phenotypes with corresponding marker genes and functional gene  
996 sets. **h** Relative contribution of each DC phenotype (in %) to COVID-19 versus non-COVID-19. **i** Relative  
997 contribution of each DC phenotype (in %) to mild versus critical COVID-19. **j** Subclustering of B-cells and  
998 plasma cells into 4 phenotypes, as indicated by the color-coded legend. **k** Heatmap showing B-cell and  
999 plasma cell phenotypes with corresponding marker genes and functional gene sets. **l** Feature plots of marker  
1000 gene expression for each B-cell and plasma cell subcluster. **m** Violin plots showing cell cycle scores and  
1001 mitochondrial gene expression by plasma cell subcluster. **n** B-cell receptor evenness in B-cell and plasma  
1002 cell subclusters. **o** Relative contribution of each B-cell and plasma cell phenotype (in %) to COVID-19 versus  
1003 non-COVID-19. **p** Relative contribution of each B-cell and plasma cell phenotype (in %) to mild versus  
1004 critical COVID-19. P values were assessed by a Mann-Whitney test. \* P<0.05, \*\* P<0.01, \*\*\*P<0.001.  
1005

## 1006 **Fig. 7. SARS-CoV-2 RNA detection in epithelial and immune cells**

1007 **a** Subclustering of epithelial cells into 7 phenotypes, as indicated by the color-coded legend. **b** Heatmap  
1008 showing epithelial cell phenotypes with corresponding marker genes. **c** Relative contribution of each  
1009 epithelial cell phenotype (in %) to COVID-19 versus non-COVID-19. **d** Relative contribution of each  
1010 epithelial cell phenotype (in %) to mild versus critical COVID-19. **e-f** Expression level of *ACE2* (**e**) and

1011 *TMPRSS2* (f) by epithelial cell subclusters, comparing COVID-19 versus non-COVID-19. g Expression levels  
1012 of *ACE2*, *TMPRSS2* and *SARS-CoV-2* (cells with viral reads) RNA in epithelial, myeloid and lymphoid cells from  
1013 COVID-19. h Detection of 11 *SARS-CoV-2* open-reading frames in epithelial, myeloid and lymphoid cells  
1014 from COVID-19. i Detection of spike protein (S) and nucleocapsid protein (N) encoding viral RNA in  
1015 epithelial cells and immune cell subclusters from COVID-19. Cell types with <50 positive cells are not  
1016 shown. j Differential gene expression of *N*-positive versus *N*-negative neutrophils from 17 COVID-19  
1017 patients in which viral reads were detected. k-l REACTOME (k) and GO (l) pathway analysis on IFN-  
1018 signalling and response-to-virus signalling, comparing *N*-positive versus *N*-negative neutrophils from 17  
1019 COVID-19 patients in which viral reads were detected. m Detection of reads mapping to *SARS-CoV-2* and  
1020 to *N* in neutrophil subclusters from COVID-19 BAL. P values were assessed by a Mann-Whitney test. \*  
1021  $P < 0.05$ , \*\*  $P < 0.01$ , \*\*\*  $P < 0.001$ .

1022

### 1023 **Fig. 8. Cell-to-cell communication between epithelial and immune cells**

1024 a Number of predicted interactions ( $P \leq 0.05$ ) between monocytes, macrophages, T-cells, neutrophils and  
1025 epithelial cells based on CellPhoneDB in critical (left panel) and mild (right panel) COVID-19. b Differences  
1026 in the number of predicted interactions, comparing mild versus critical COVID-19, showing generally more  
1027 interactions in mild COVID-19. c Predicted interactions between monocytes/macrophages and neutrophils,  
1028 comparing critical versus mild COVID-19. d Predicted interactions between T-cells and neutrophils,  
1029 comparing critical versus mild COVID-19. e Predicted interactions between epithelial and myeloid cells,  
1030 comparing critical versus mild COVID-19. f Predicted interactions between T-cells and  
1031 monocytes/macrophages, comparing critical versus mild COVID-19. g Predicted interactions between T-  
1032 cells and epithelial cells, comparing critical versus mild COVID-19.

1033

1034

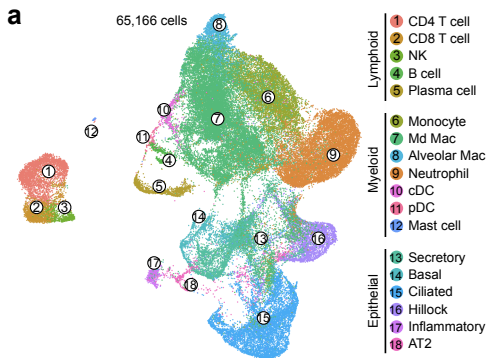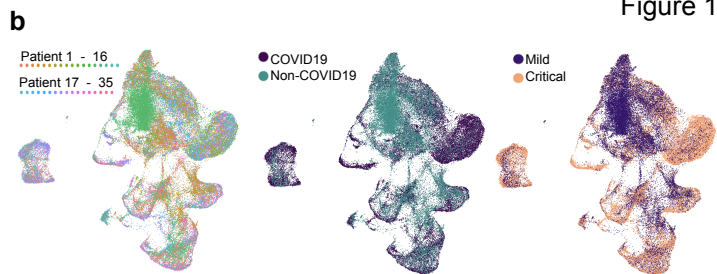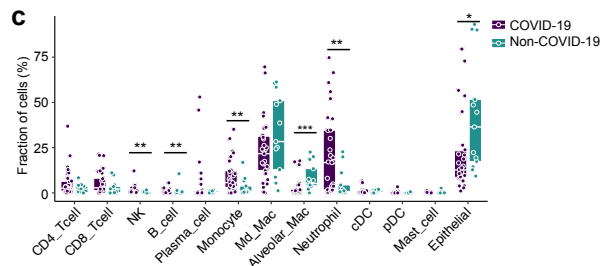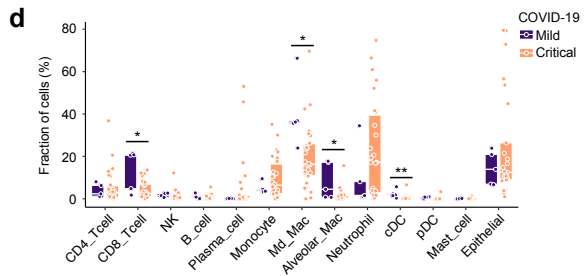

Figure 2

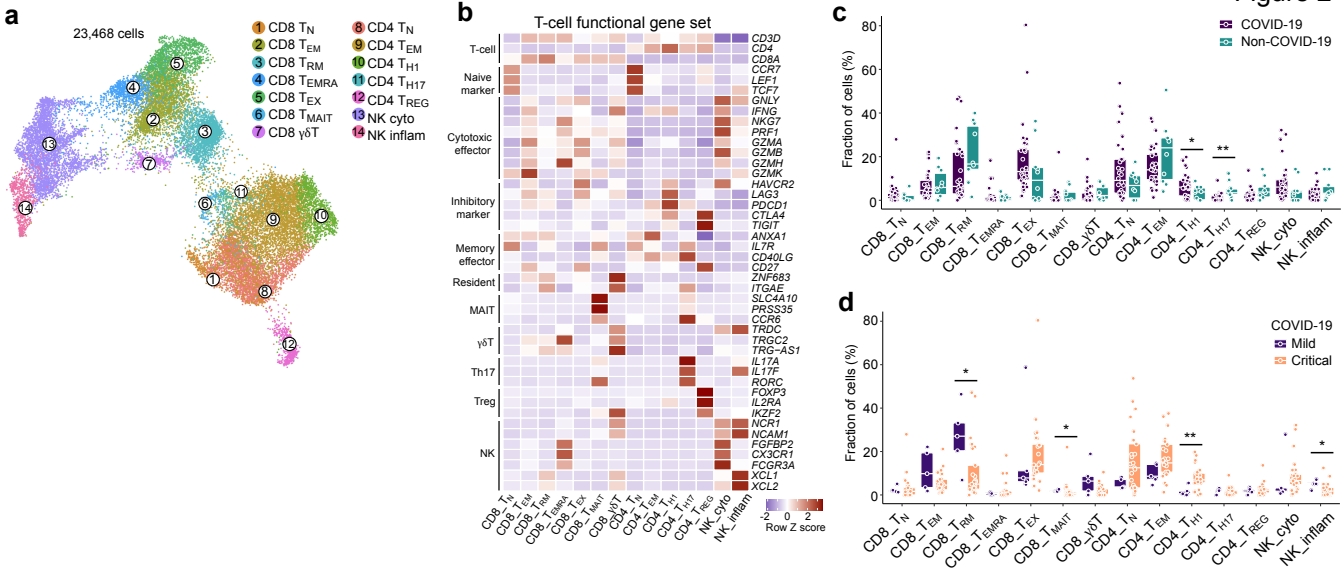



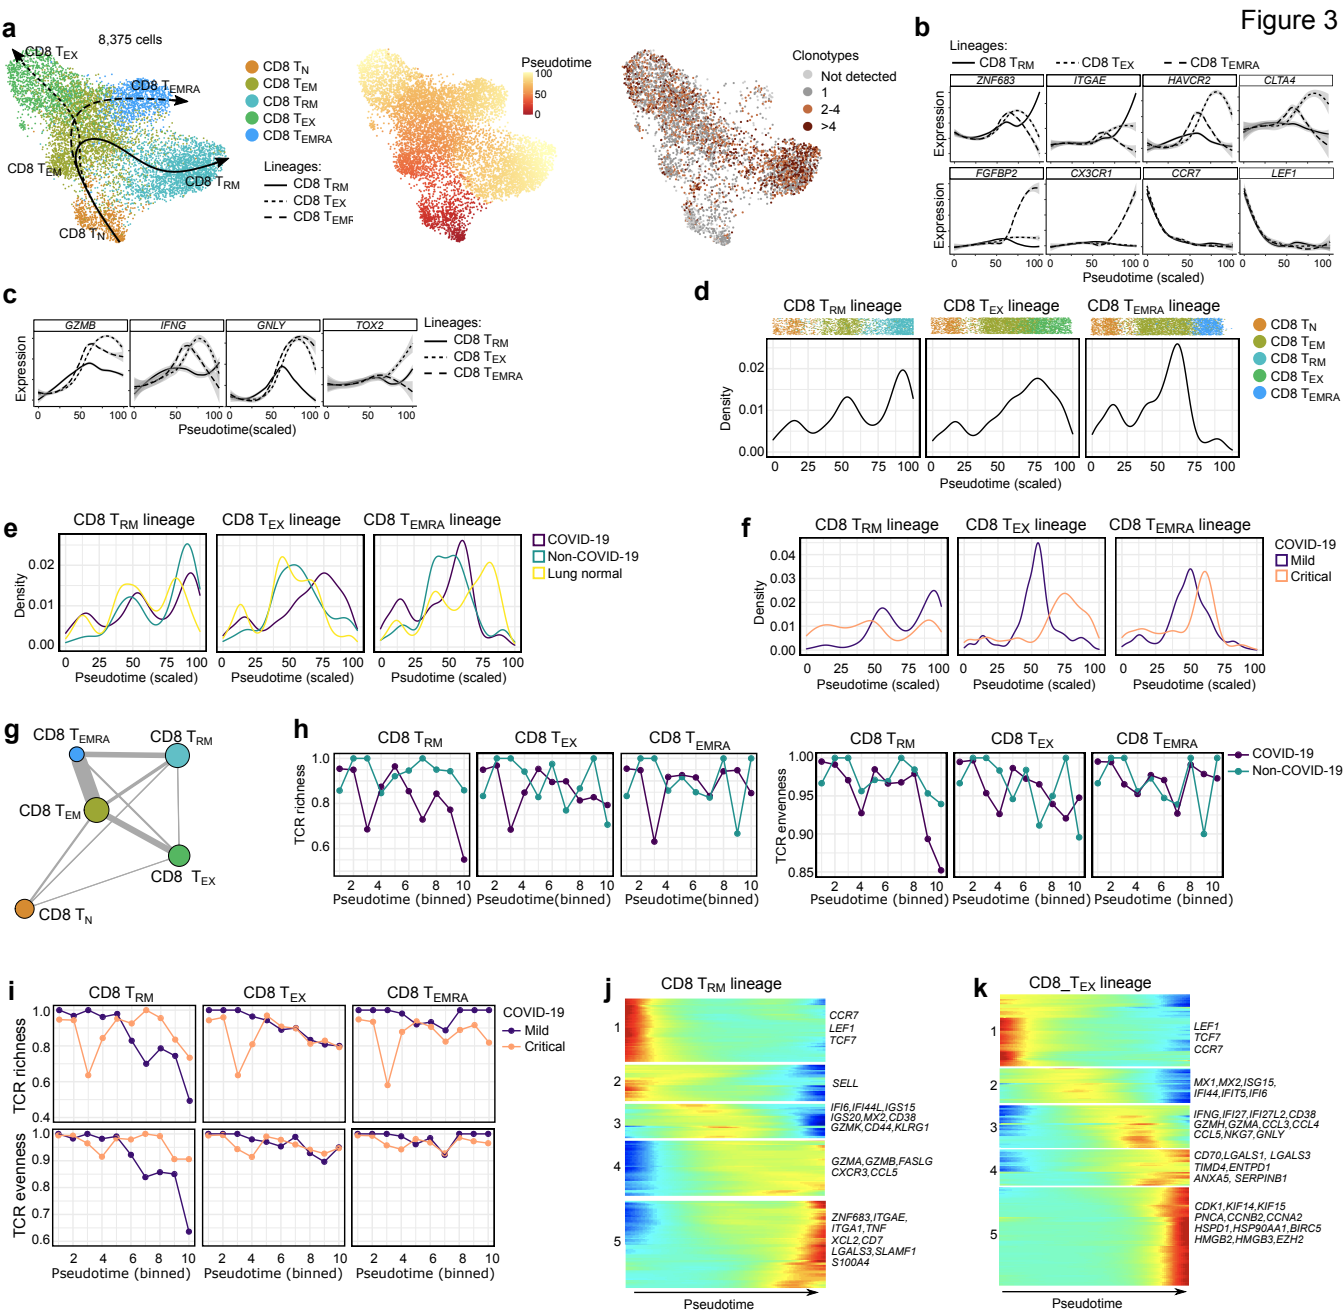

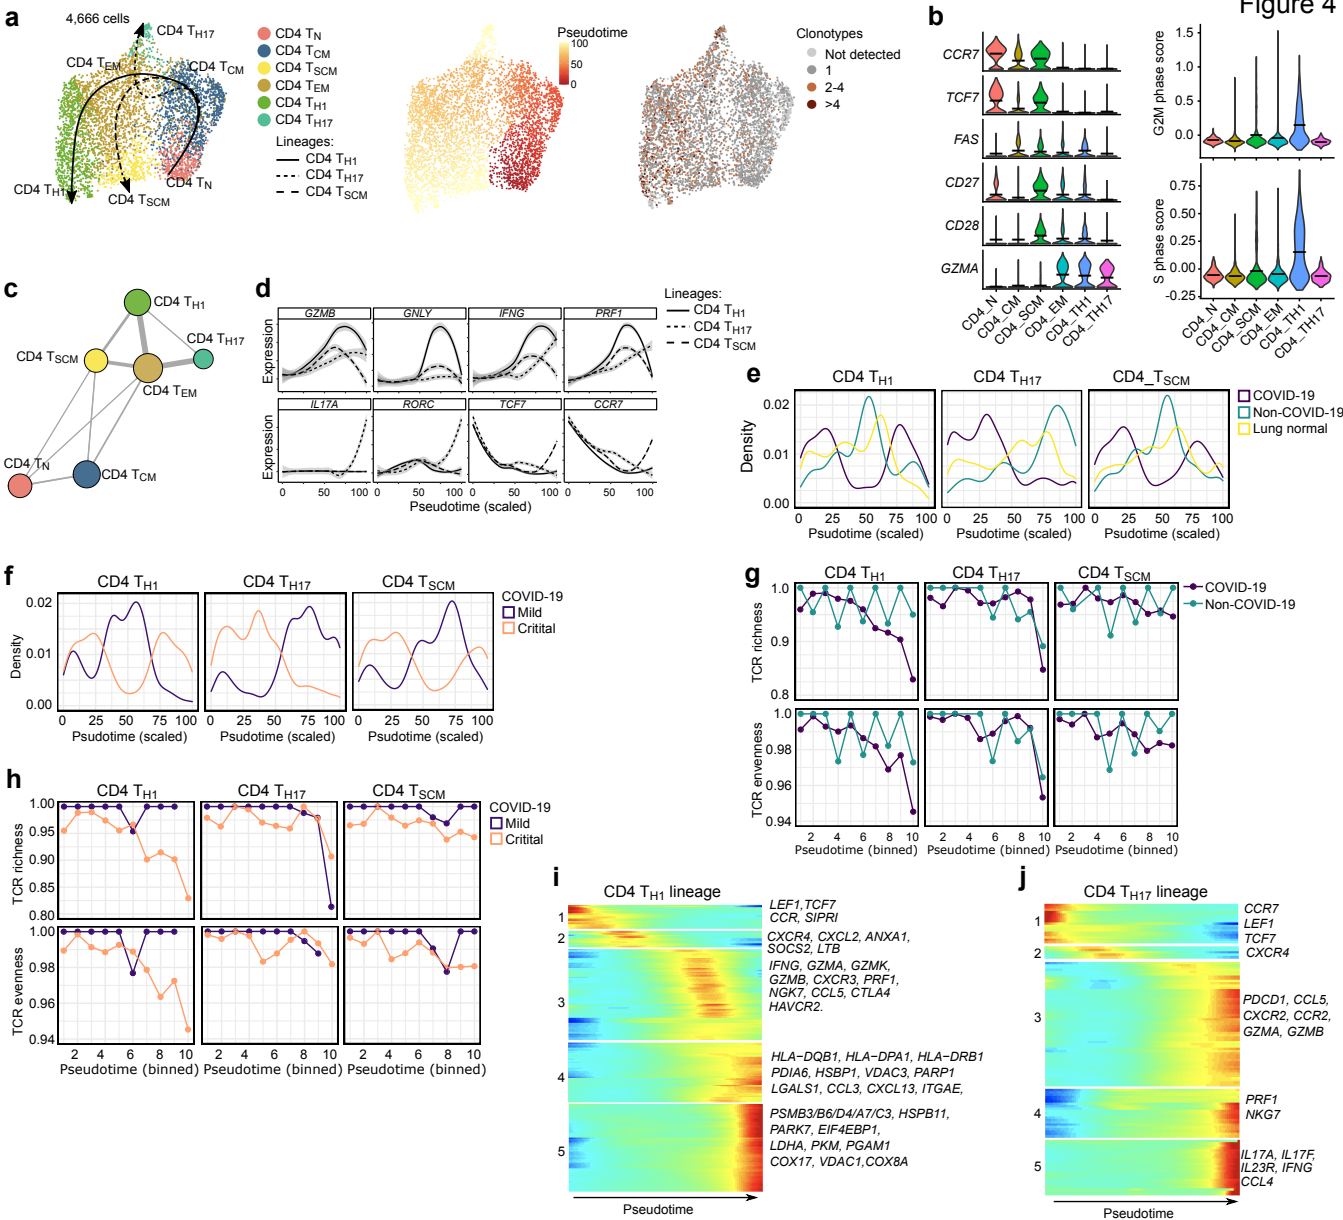

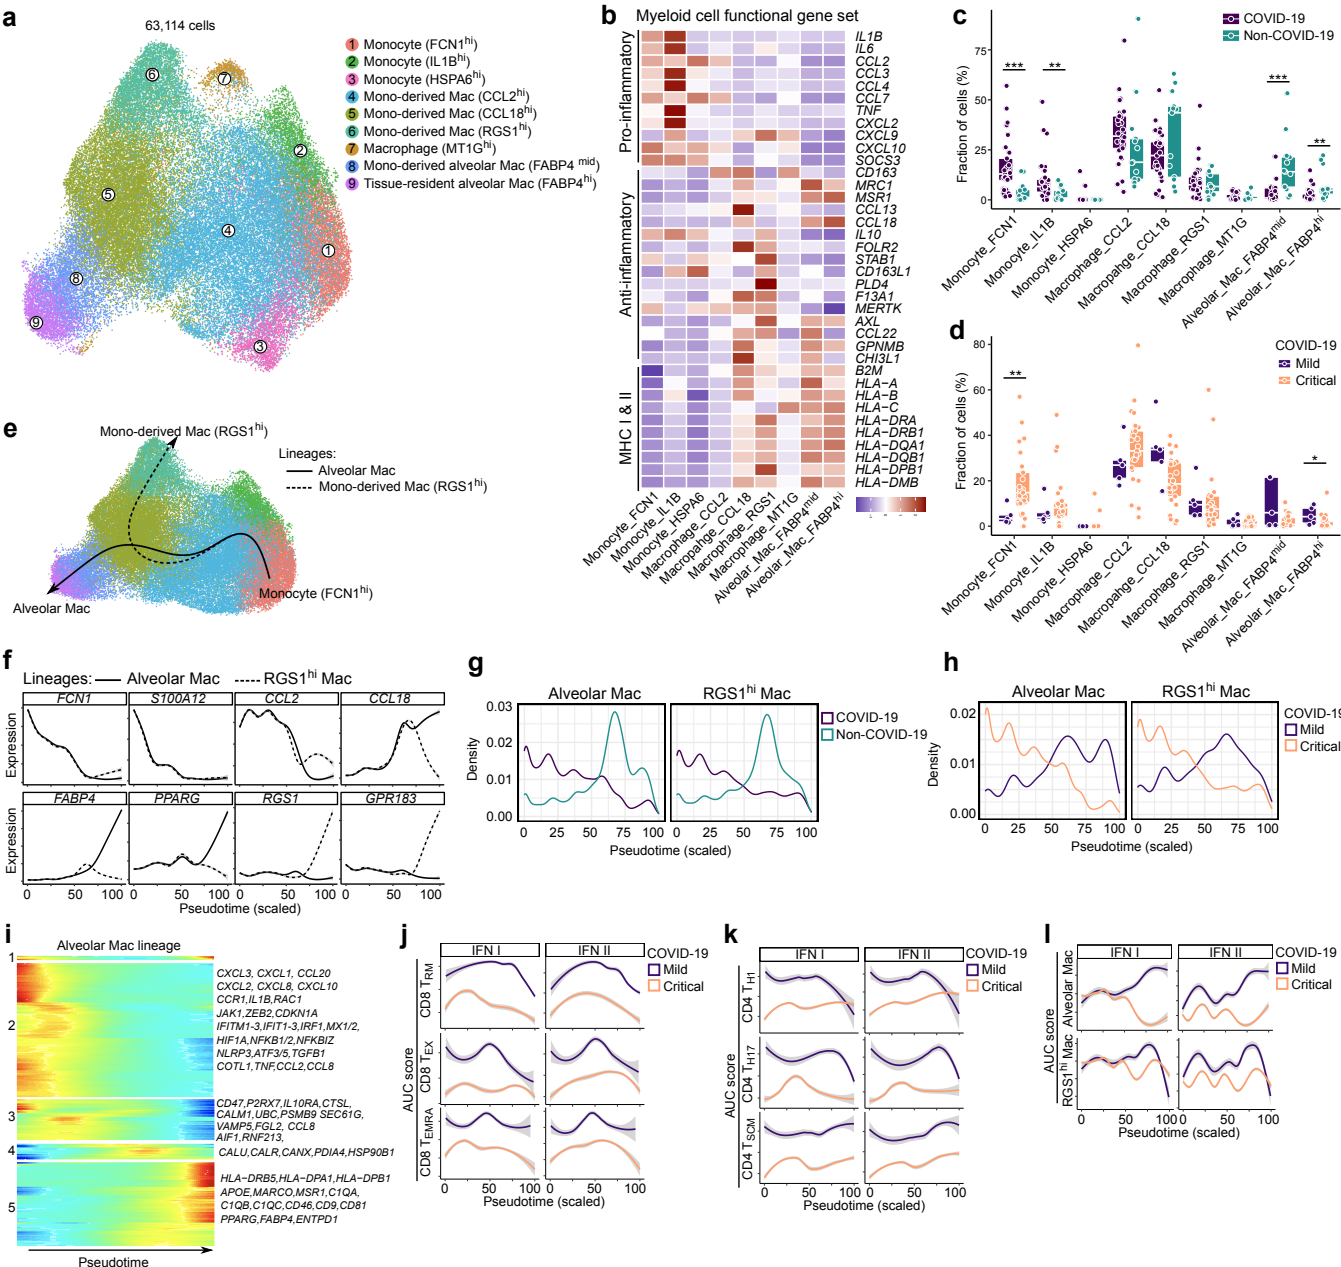

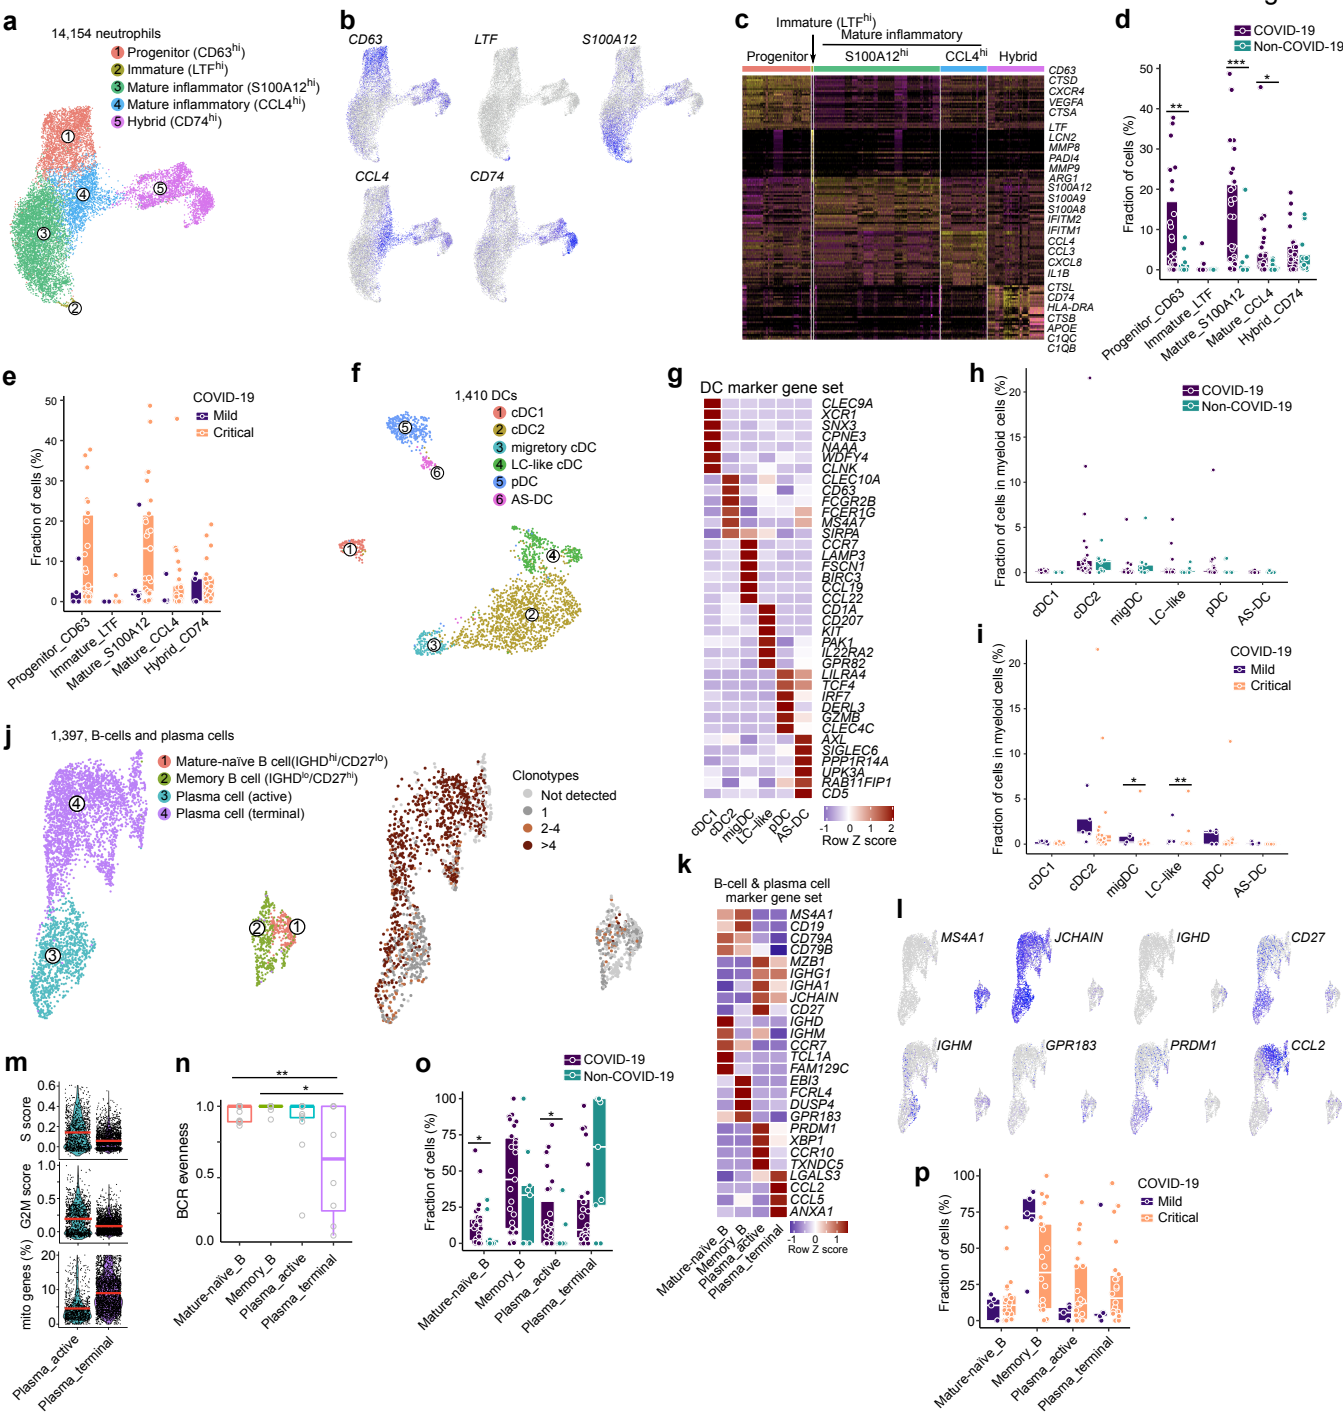

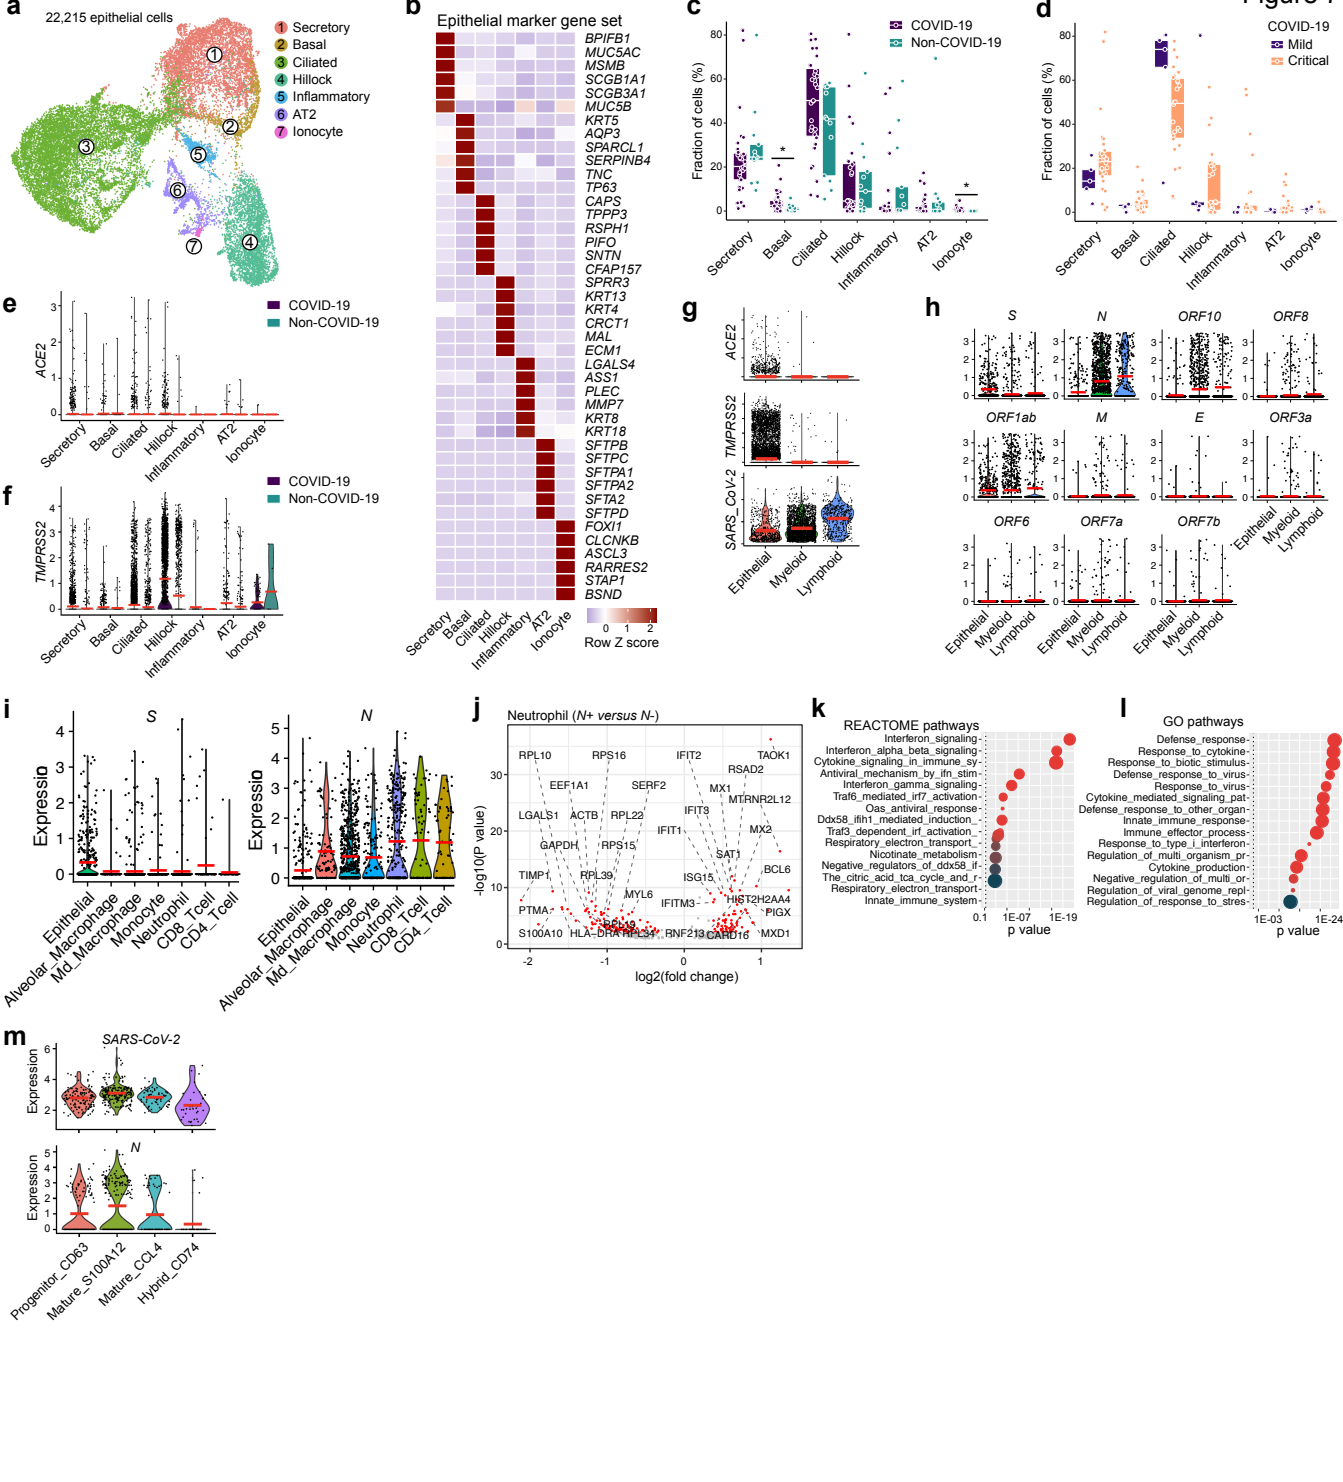

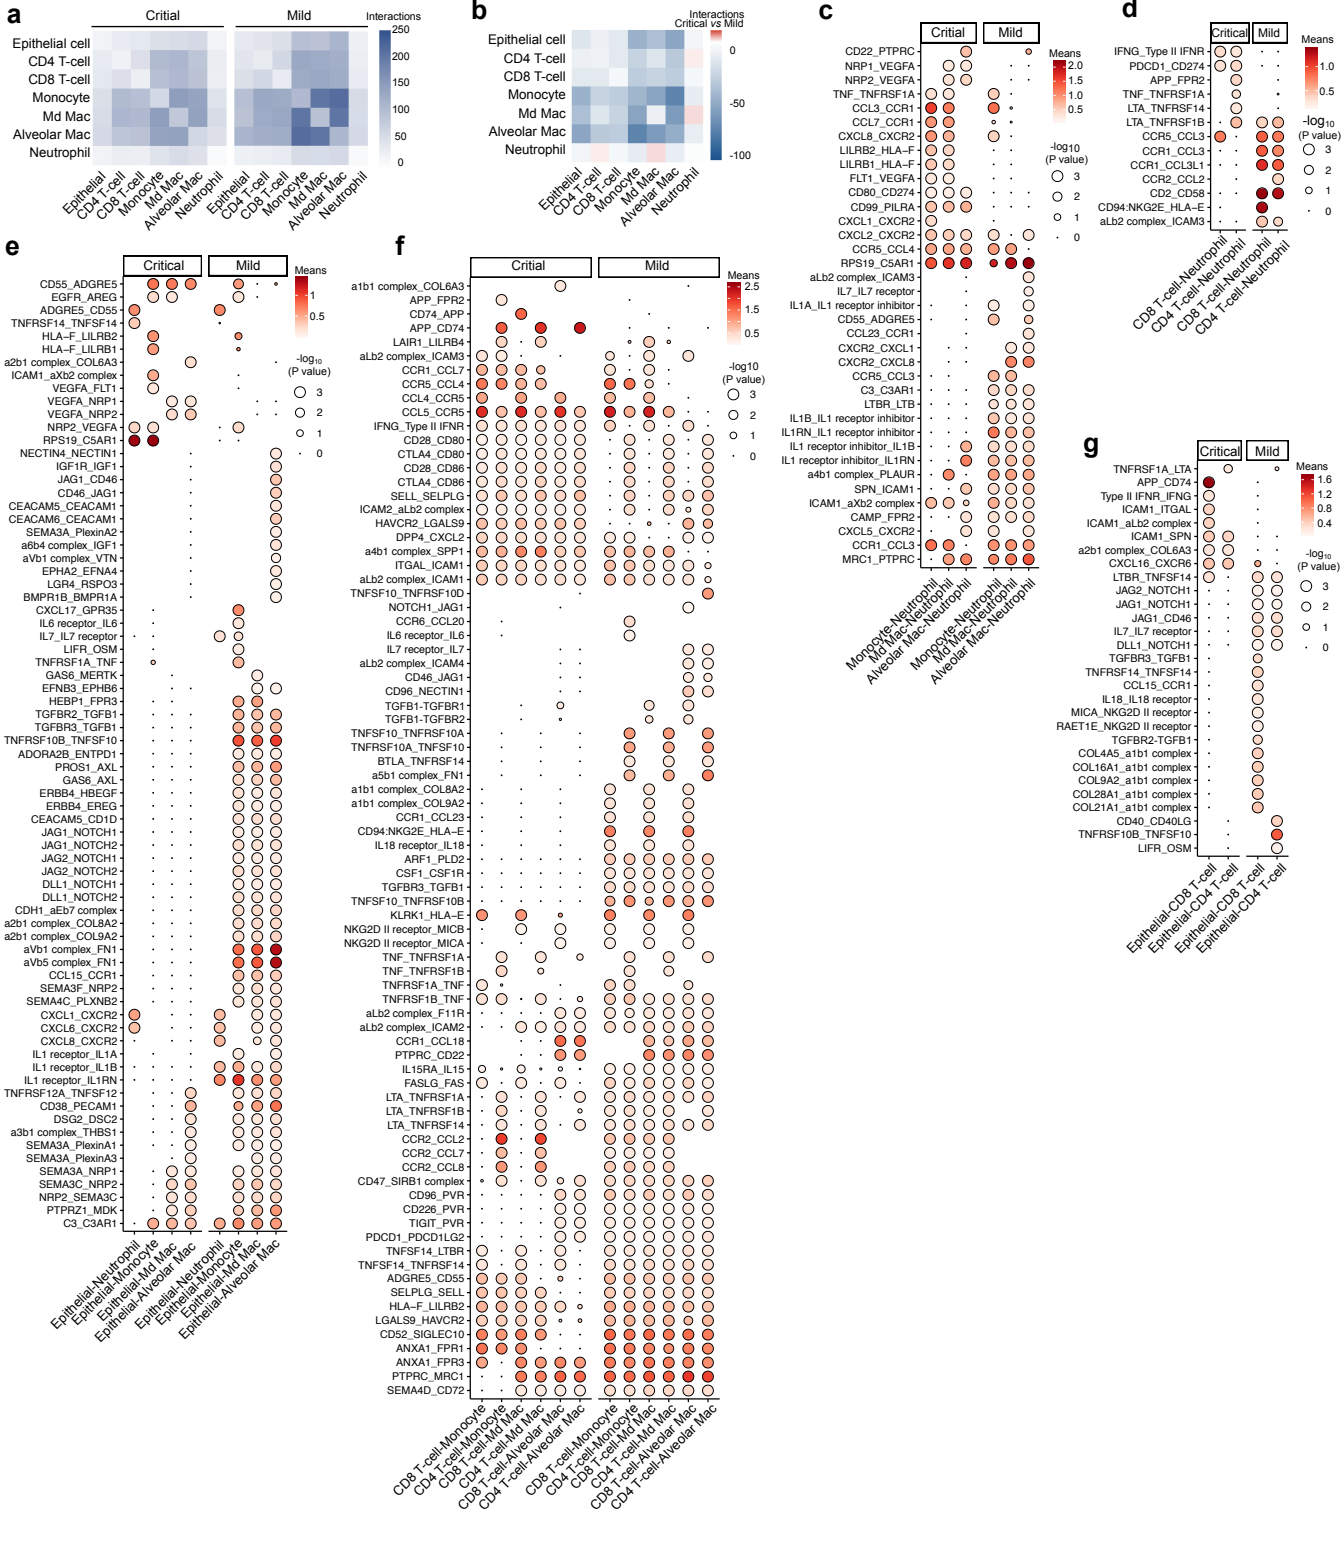

Source: https://www.biorxiv.org/content/biorxiv/early/2020/07/10/2020.07.09.196519.full.pdf
